# Supplementary material for: Lactones with Methylcyclohexane Systems Obtained by Chemical and Microbiological Methods and Their Antimicrobial Activity
Source: PubMed Central journal article supplement (PMC6272377; doi:10.3390/molecules20023335), 2015-02-16
Supplement: molecules-20-03335-s001.pdf [file molecules-20-03335-s001.pdf]

## Supplementary Materials

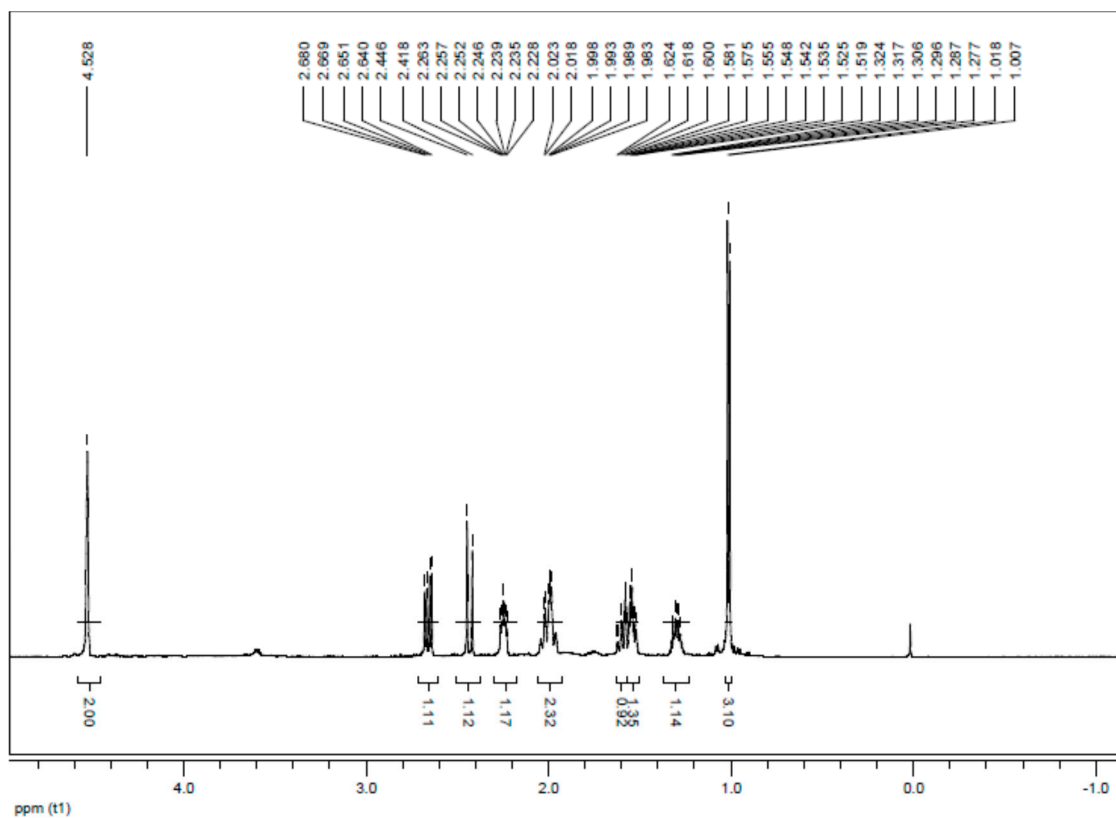

**Figure S1.**  $^1\text{H-NMR}$  (300 MHz,  $\text{CDCl}_3$ ) spectrum of chlorolactone **3a**.

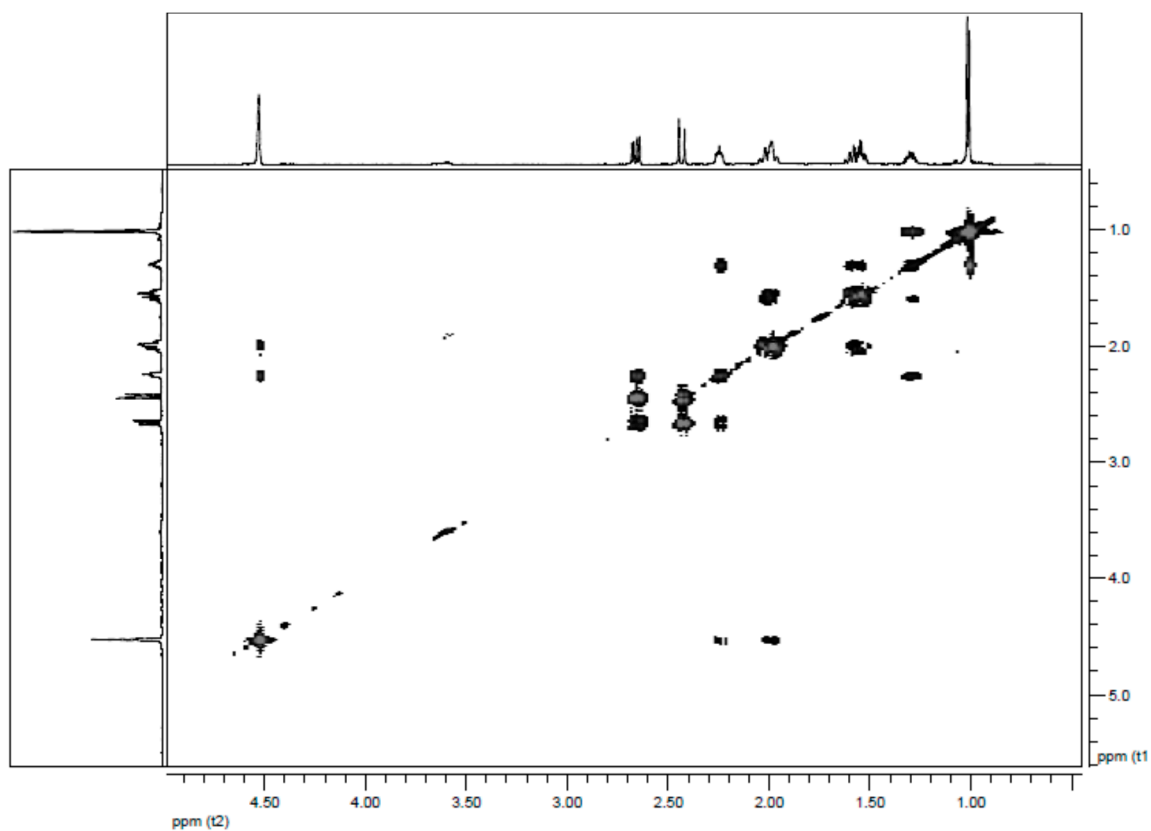

**Figure S2.** COSY (300 MHz,  $\text{CDCl}_3$ ) spectrum of chlorolactone **3a**.

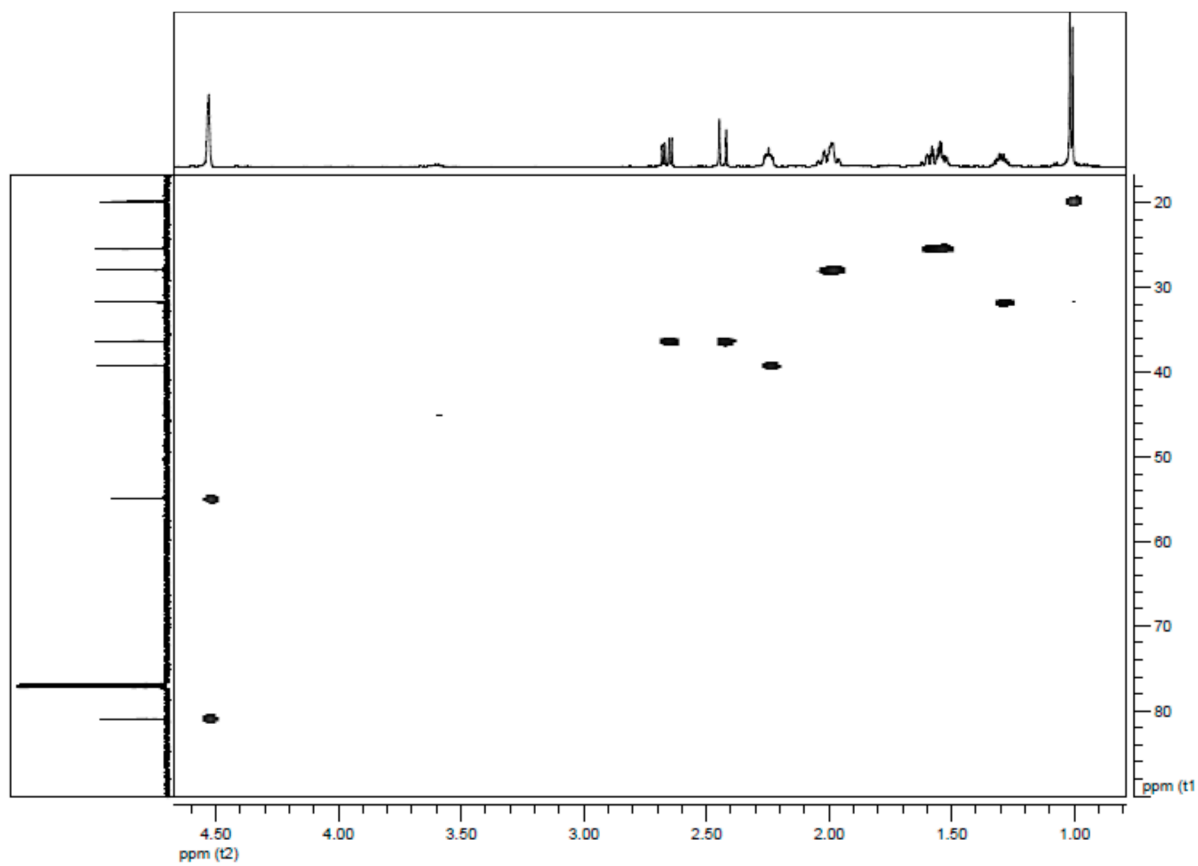

Figure S3. HMQC (300 MHz, CDCl<sub>3</sub>) spectrum of chlorolactone **3a**.

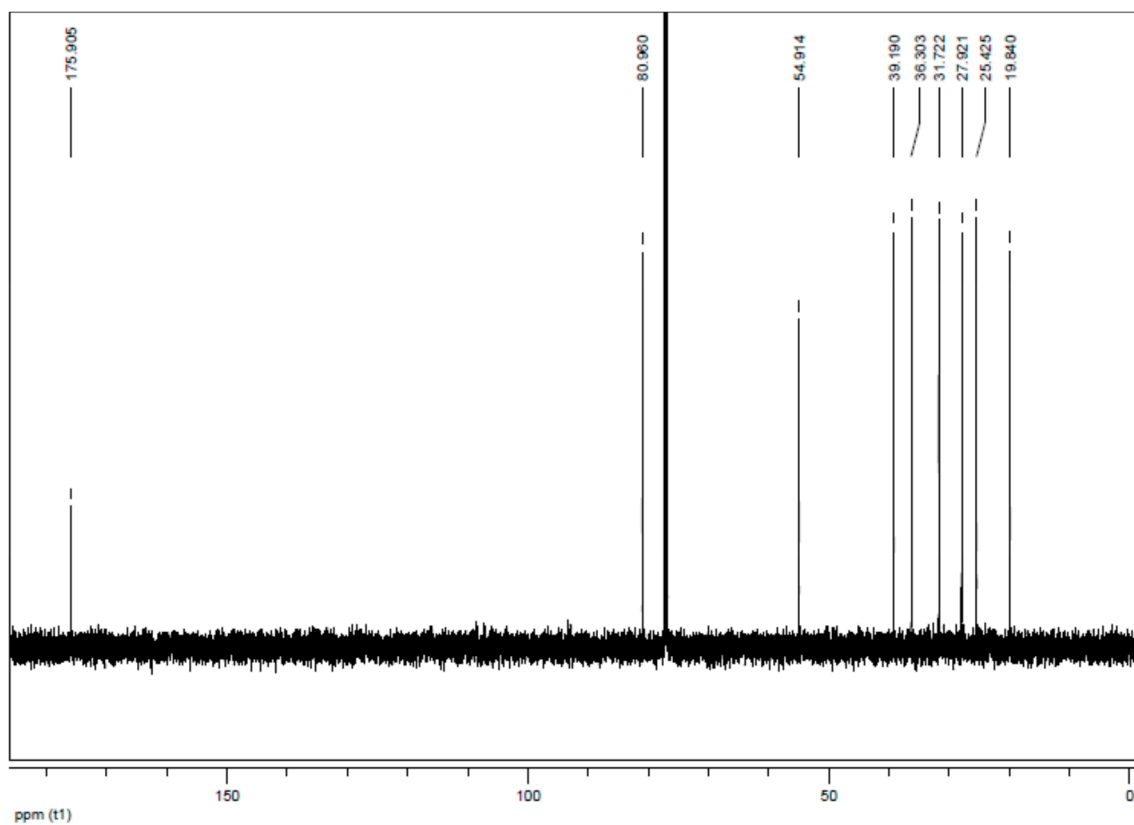

Figure S4. <sup>13</sup>C-NMR (75.5 MHz, CDCl<sub>3</sub>) spectrum of chlorolactone **3a**.

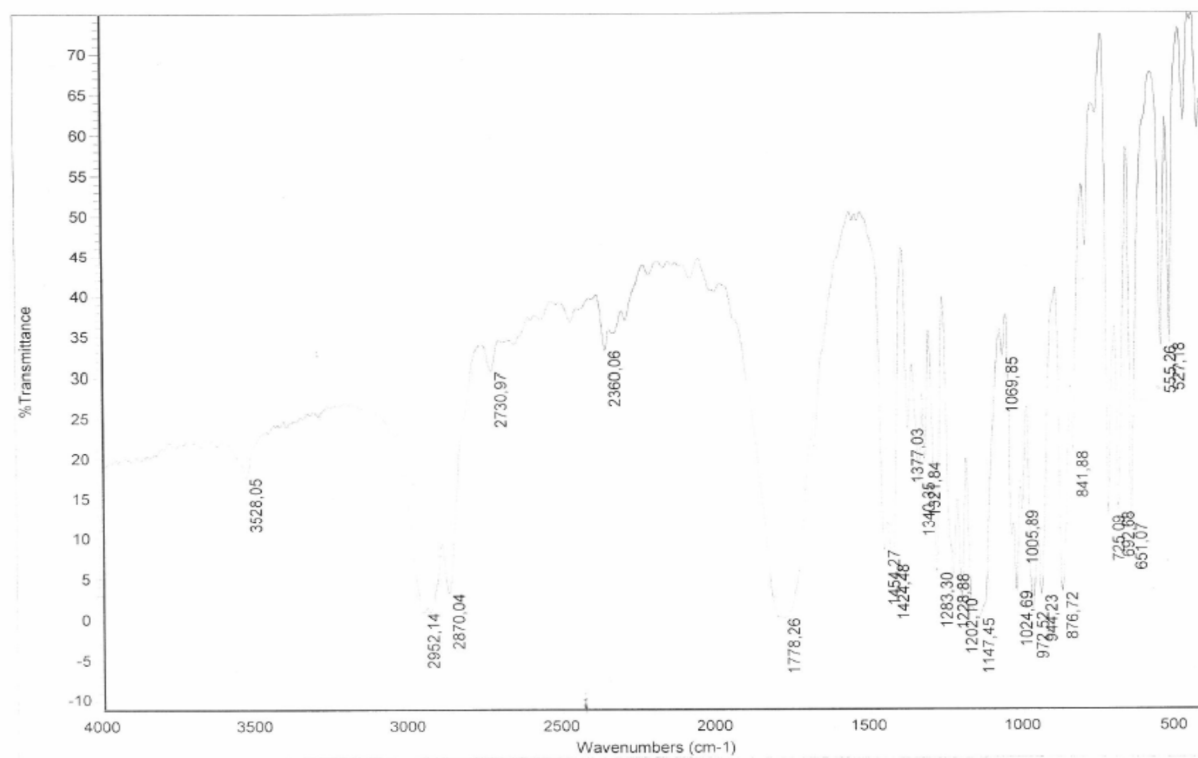

Figure S5. IR spectrum of chlorolactone 3a.

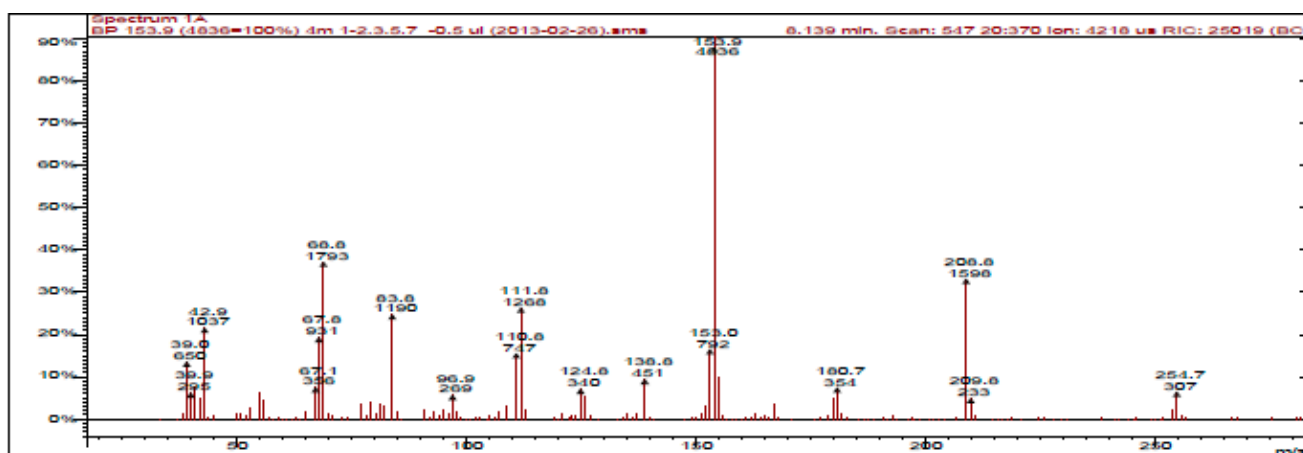

Figure S6. GC-MS spectrum of chlorolactone 3a.

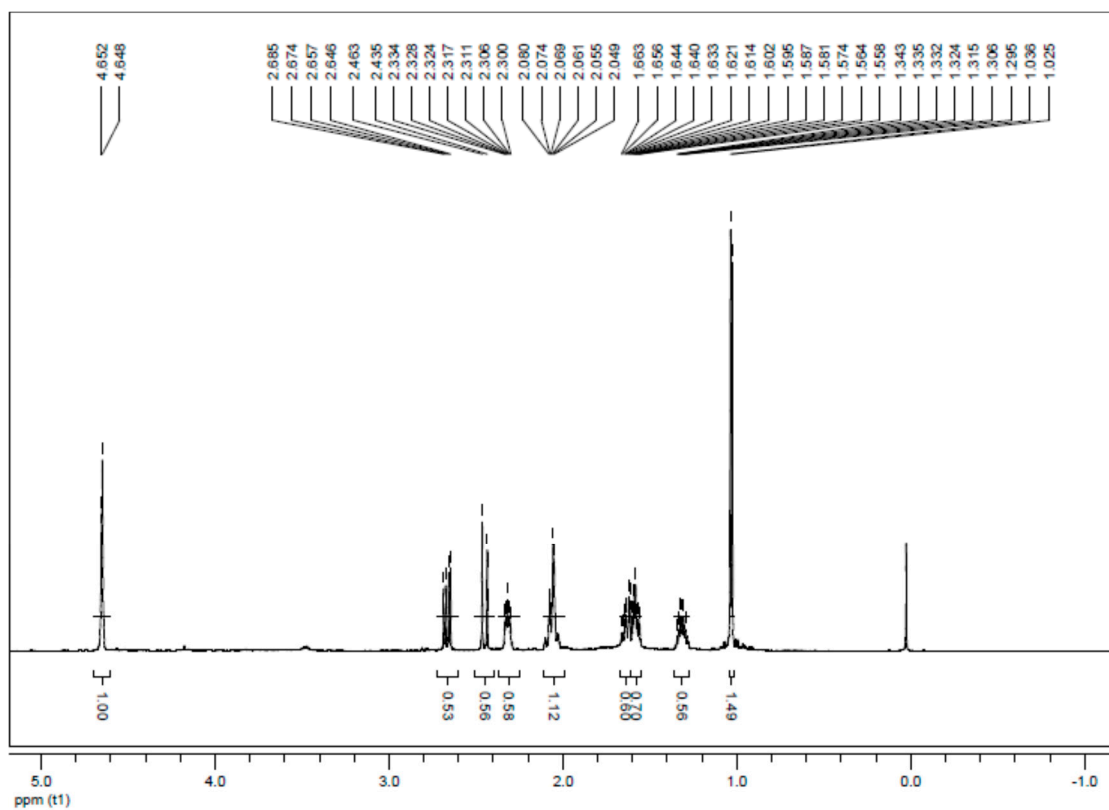

Figure S7.  $^1\text{H-NMR}$  (300 MHz,  $\text{CDCl}_3$ ) spectrum of bromolactone **4a**.

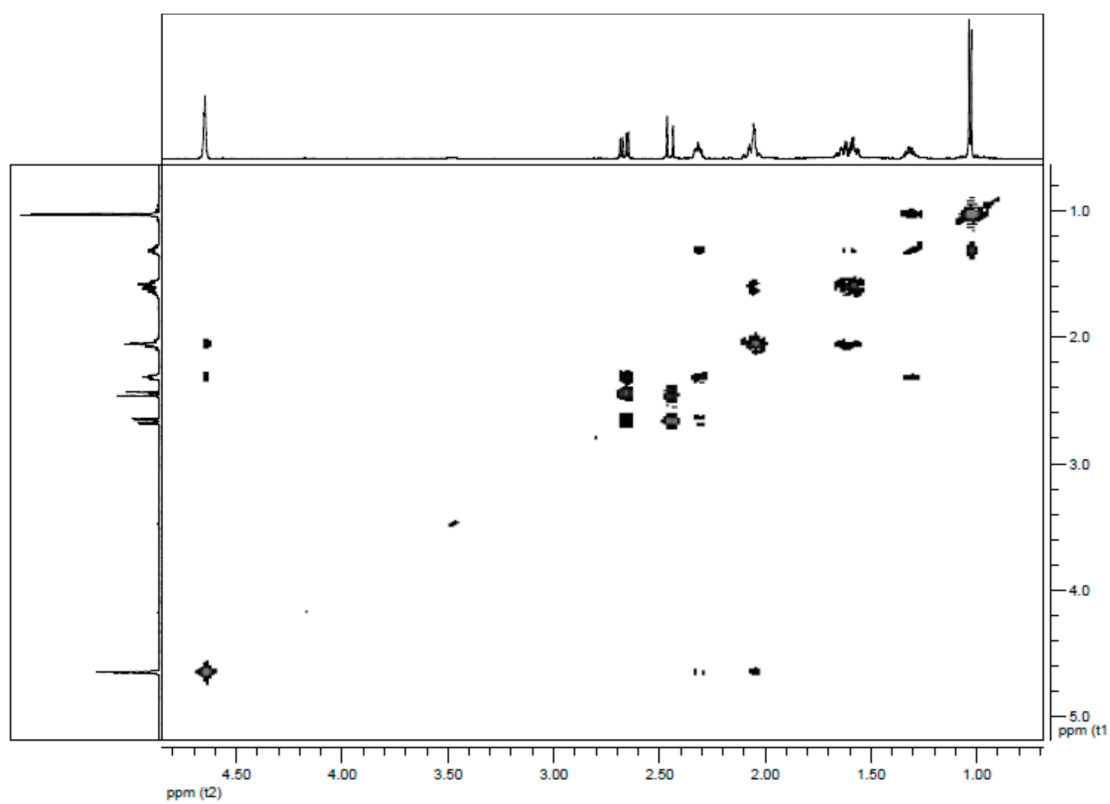

Figure S8. COSY (300 MHz,  $\text{CDCl}_3$ ) spectrum of bromolactone **4a**.

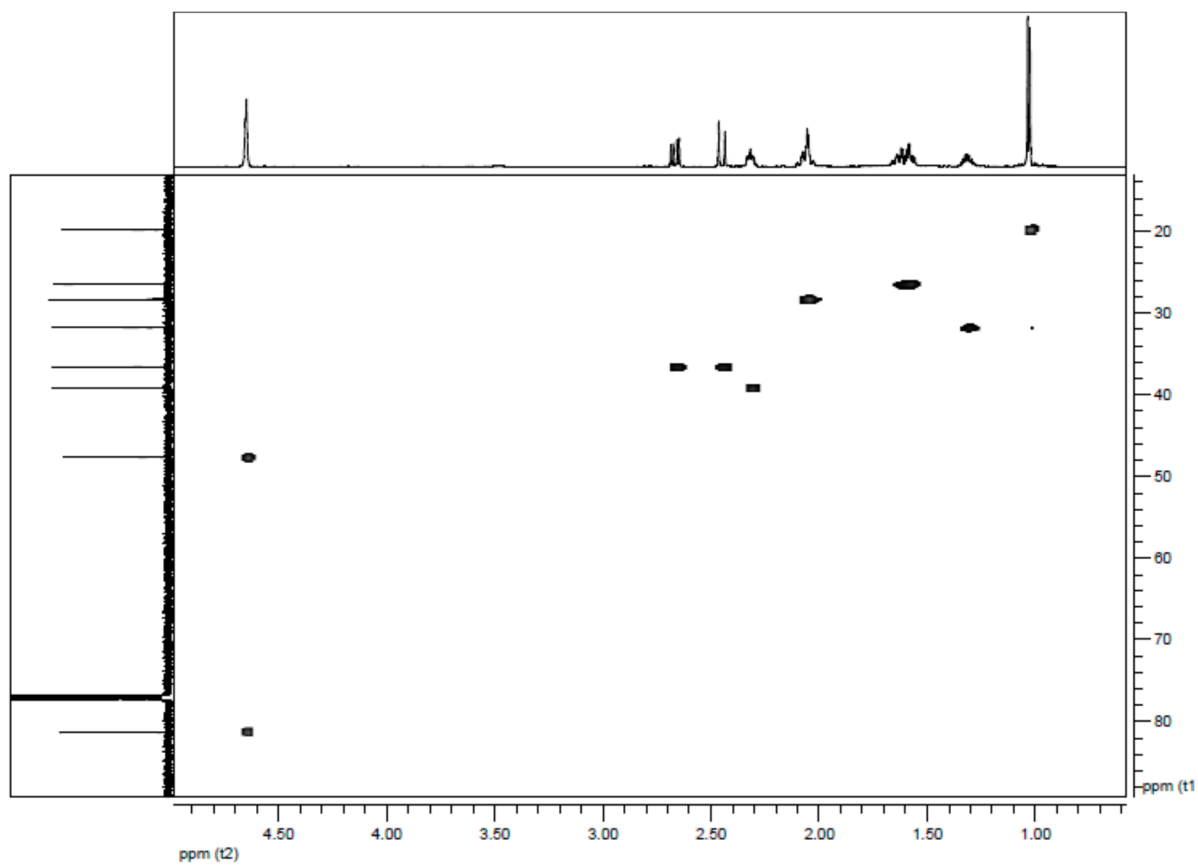

Figure S9. HMQC (300 MHz, CDCl<sub>3</sub>) spectrum of bromolactone **4a**.

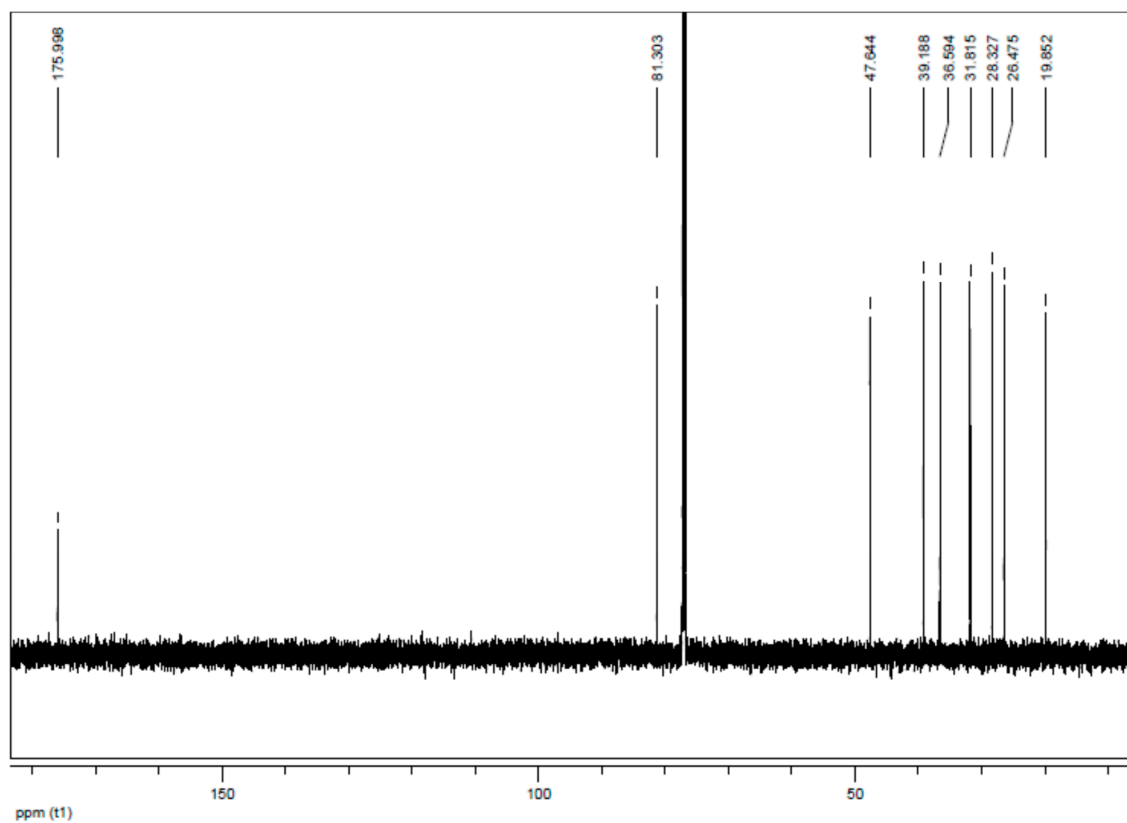

Figure S10. <sup>13</sup>C-NMR (75.5 MHz, CDCl<sub>3</sub>) spectrum of bromolactone **4a**.

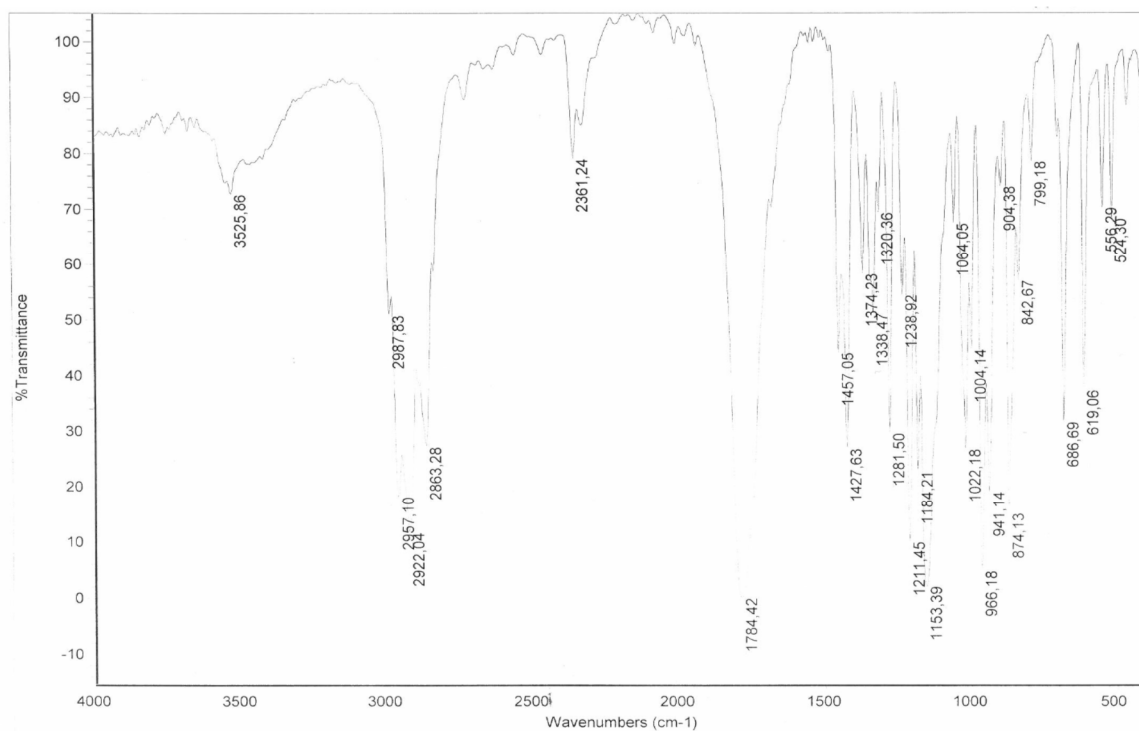

Figure S11. IR Spectrum of bromolactone 4a.

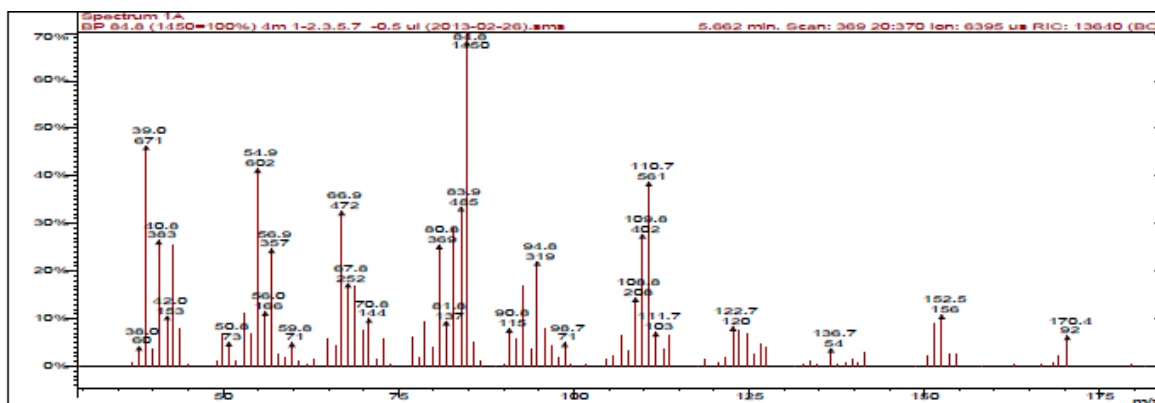

Figure S12. GC-MS spectrum of bromolactone 4a.

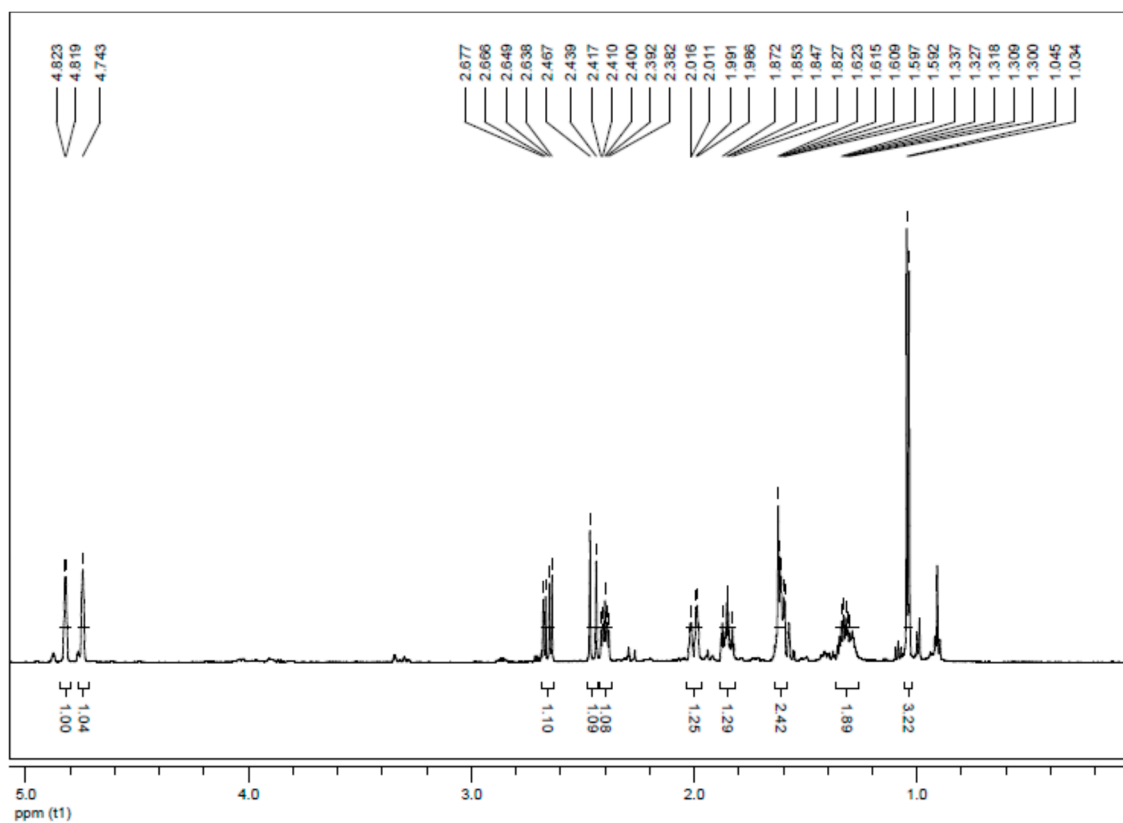

Figure S13.  $^1\text{H-NMR}$  (300 MHz,  $\text{CDCl}_3$ ) spectrum of iodolactone **5a**.

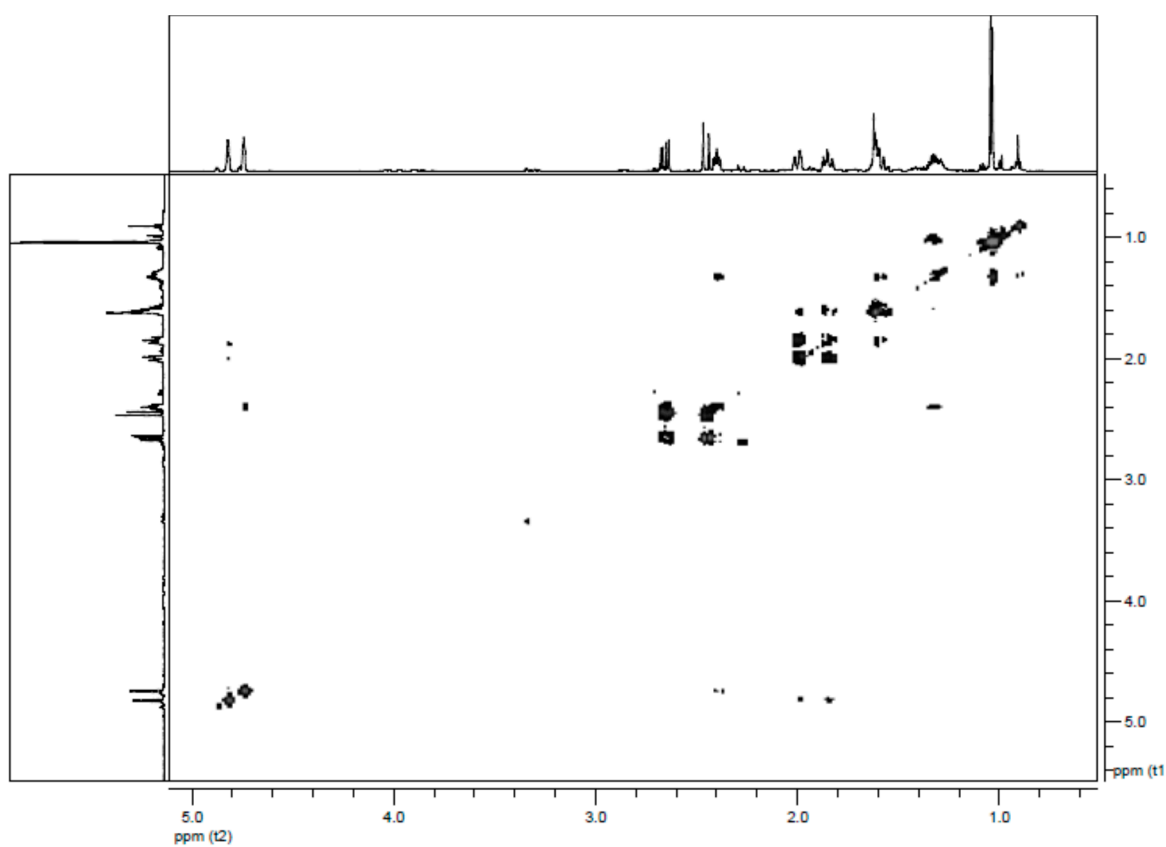

Figure S14. COSY (300 MHz,  $\text{CDCl}_3$ ) spectrum of iodolactone **5a**.

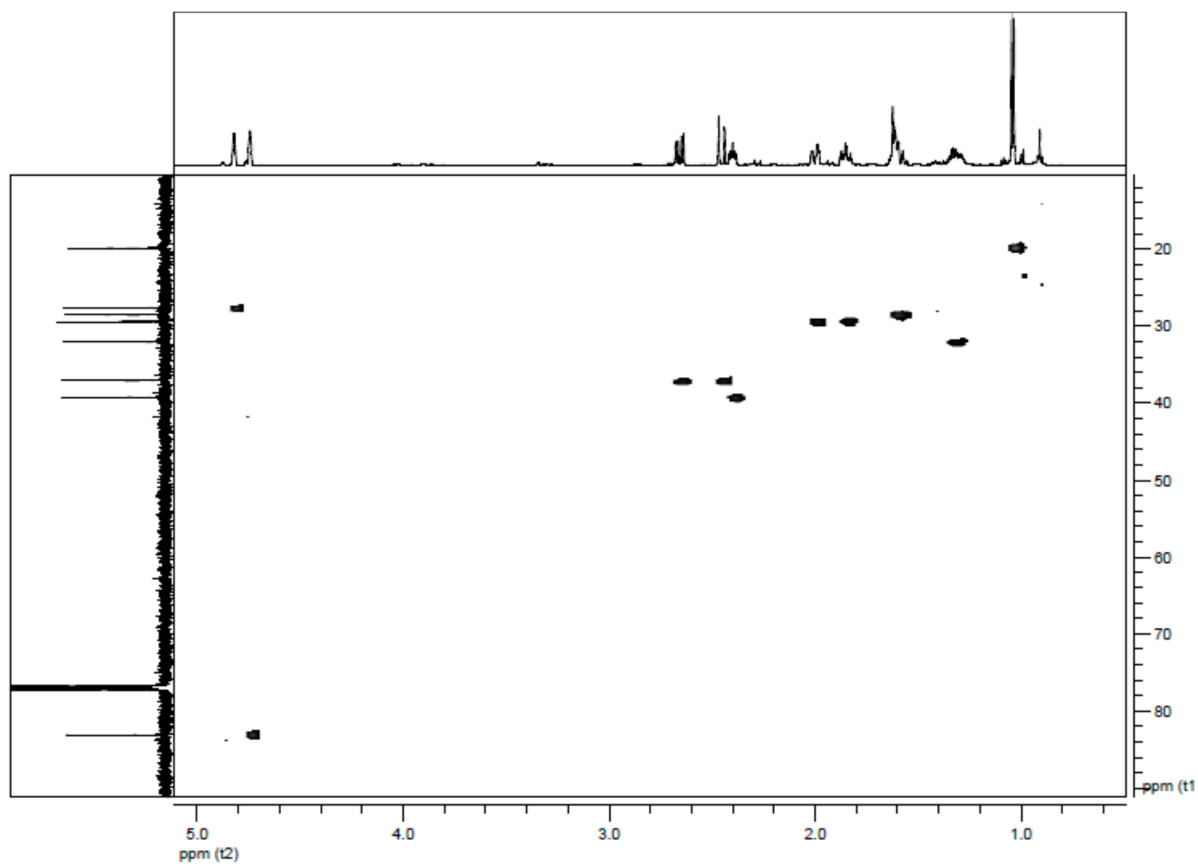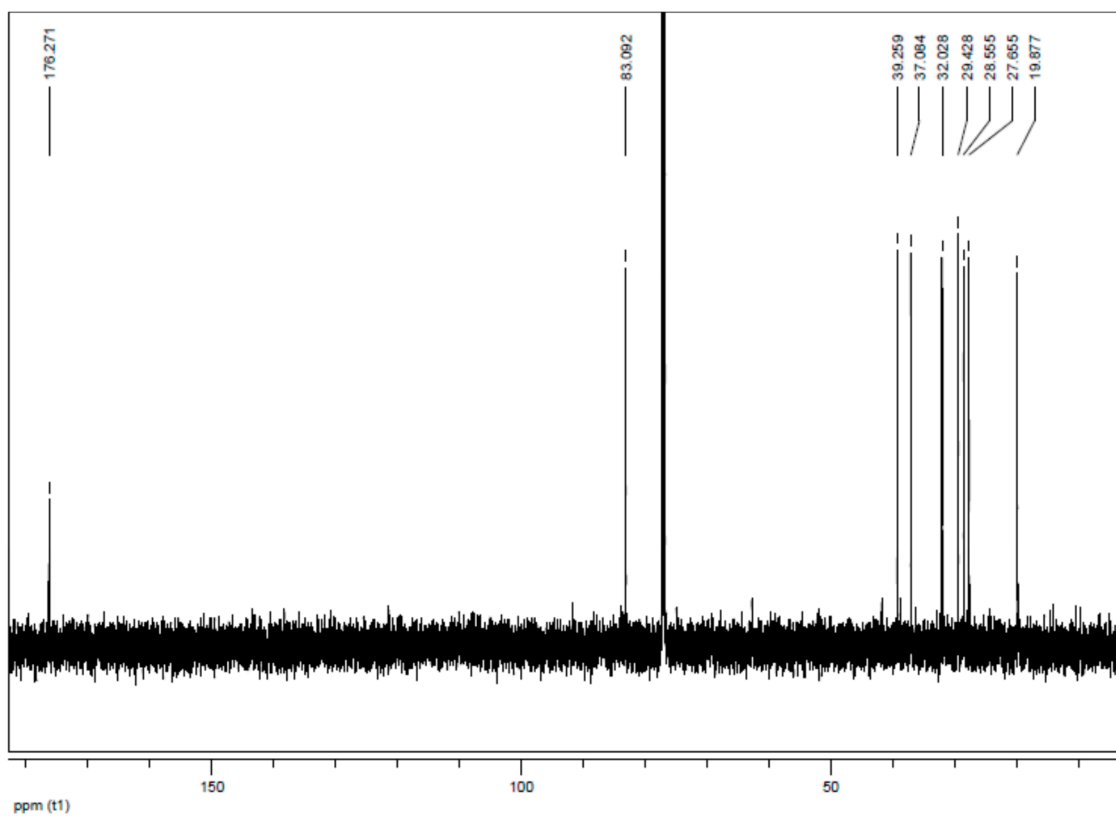



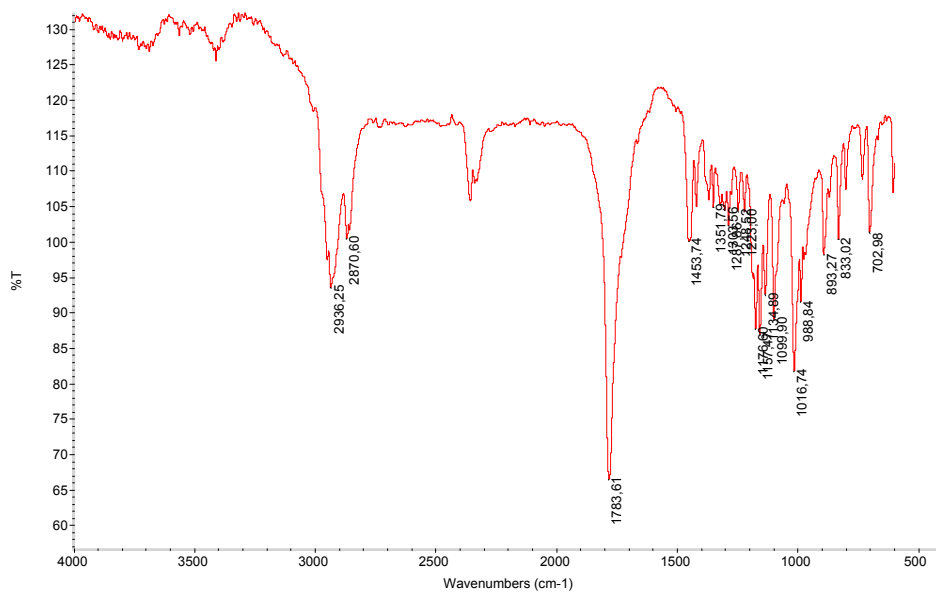

Figure S17. IR spectrum of of iodolactone 5a.

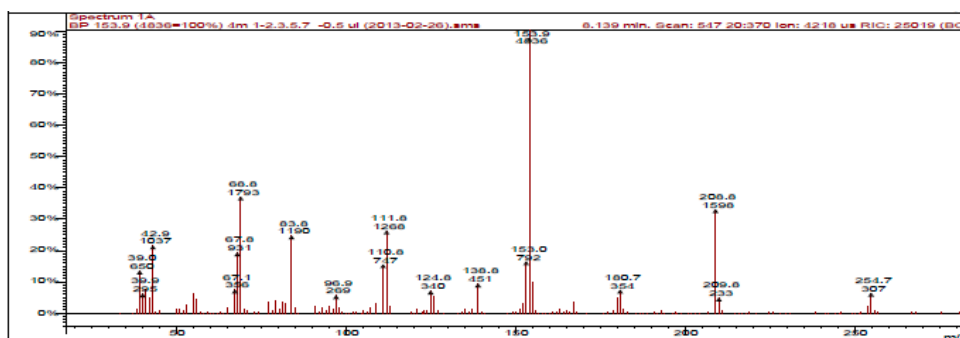

Figure S18. GC-MS spectrum of of iodolactone 5a.

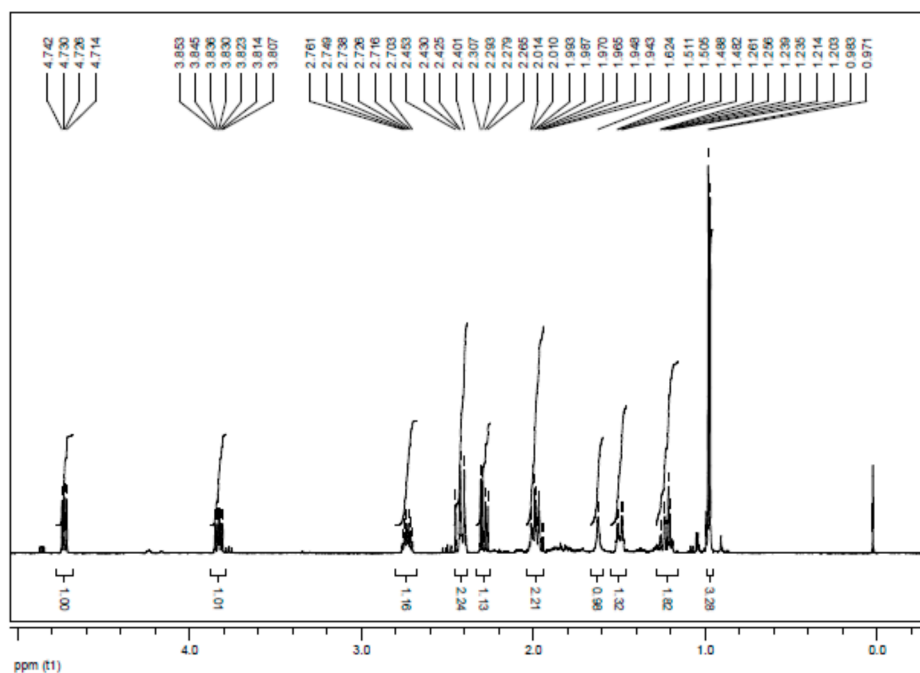

Figure S19. <sup>1</sup>H-NMR (300 MHz, CDCl<sub>3</sub>) spectrum of iodolactone 6a.

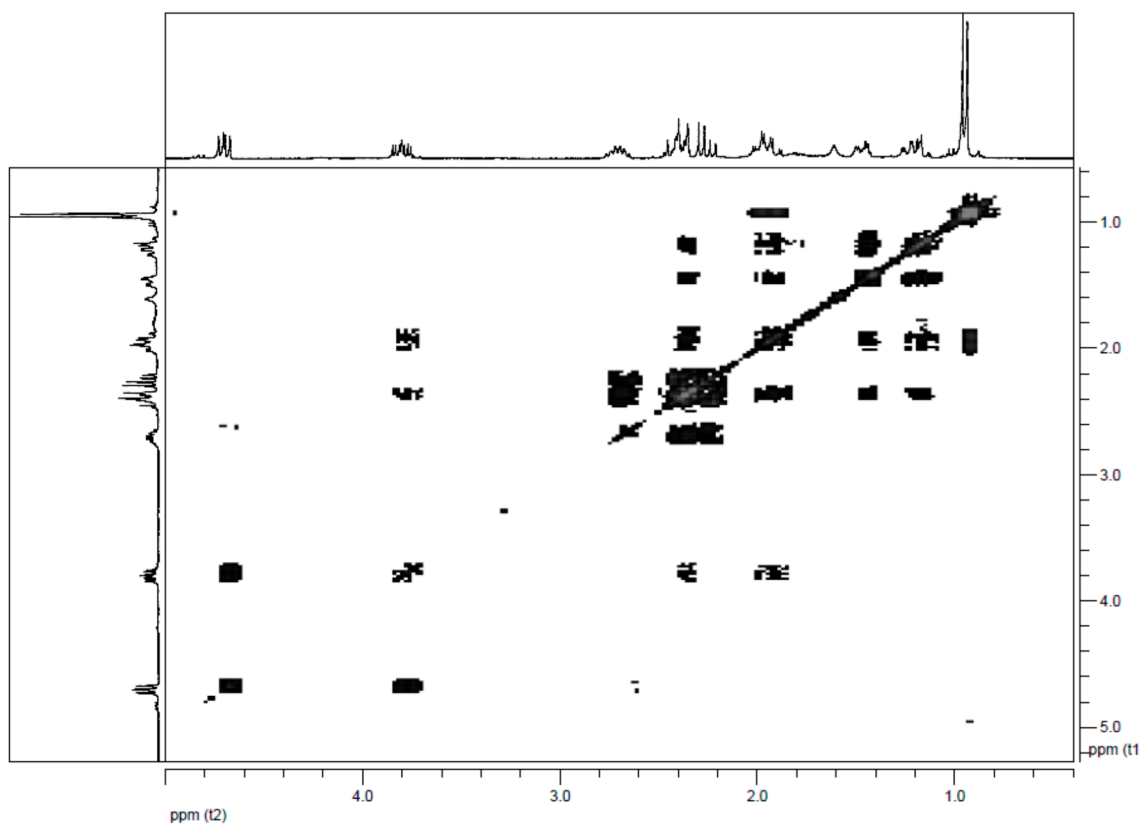

**Figure S20.** COSY (300 MHz, CDCl<sub>3</sub>) spectrum of of iodolactone **6a**.

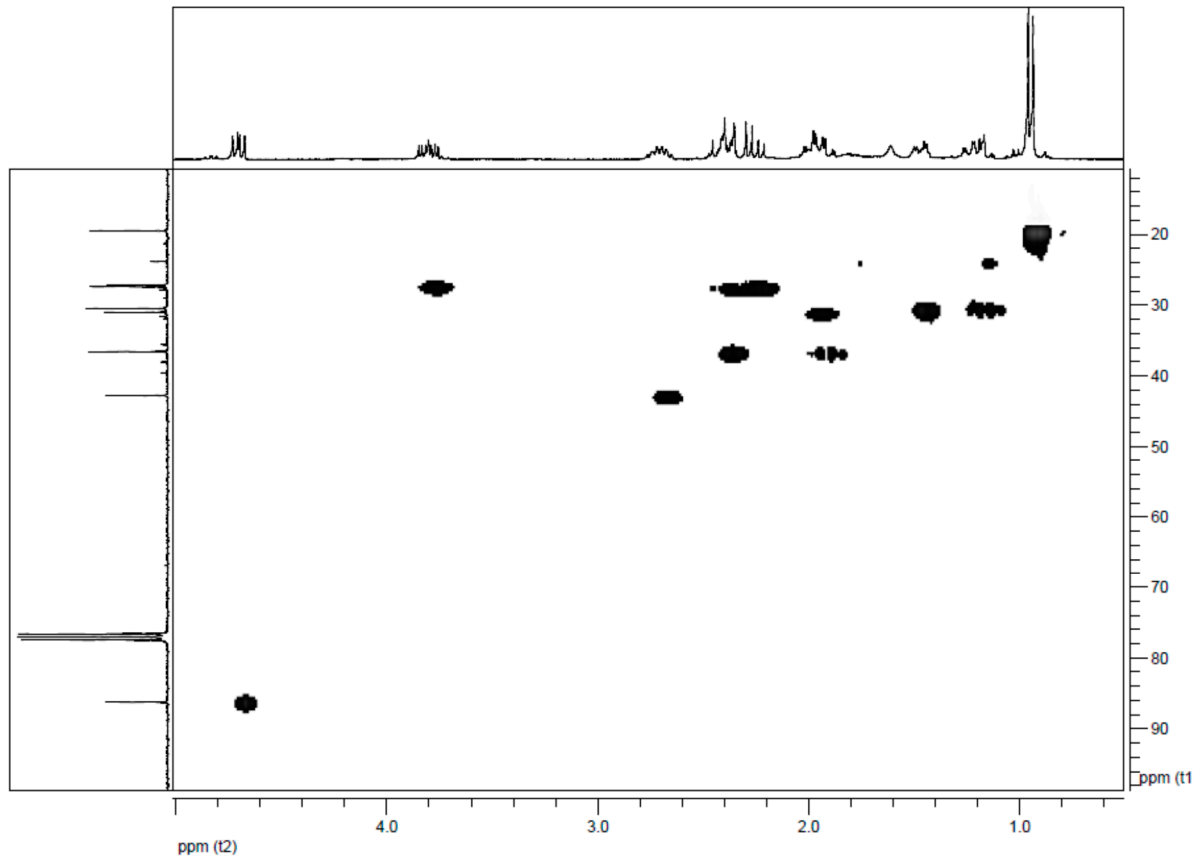

**Figure S21.** HMQC (300 MHz, CDCl<sub>3</sub>) spectrum of of iodolactone **6a**.

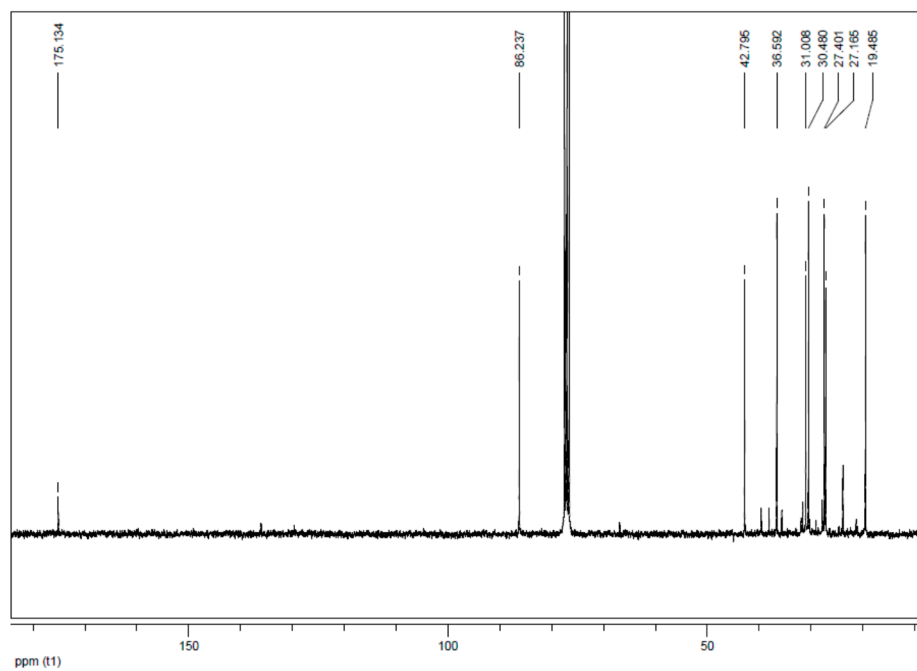

**Figure S22.**  $^{13}\text{C-NMR}$  (75.5 MHz,  $\text{CDCl}_3$ ) spectrum of iodolactone **6a**.

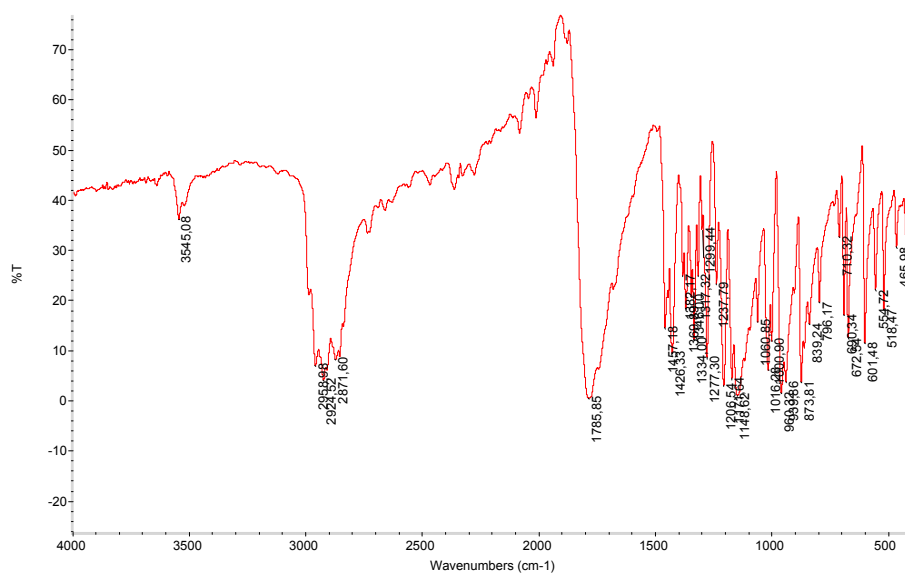

**Figure S23.** IR spectrum of iodolactone **6a**.

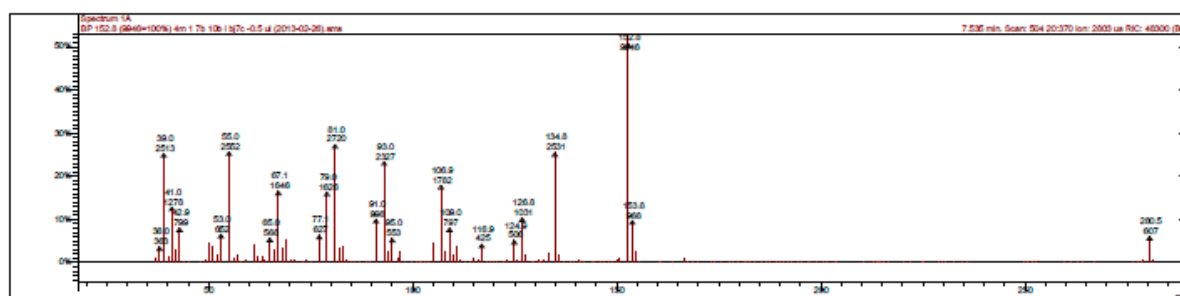

**Figure S24.** GC-MS spectrum of iodolactone **6a**.



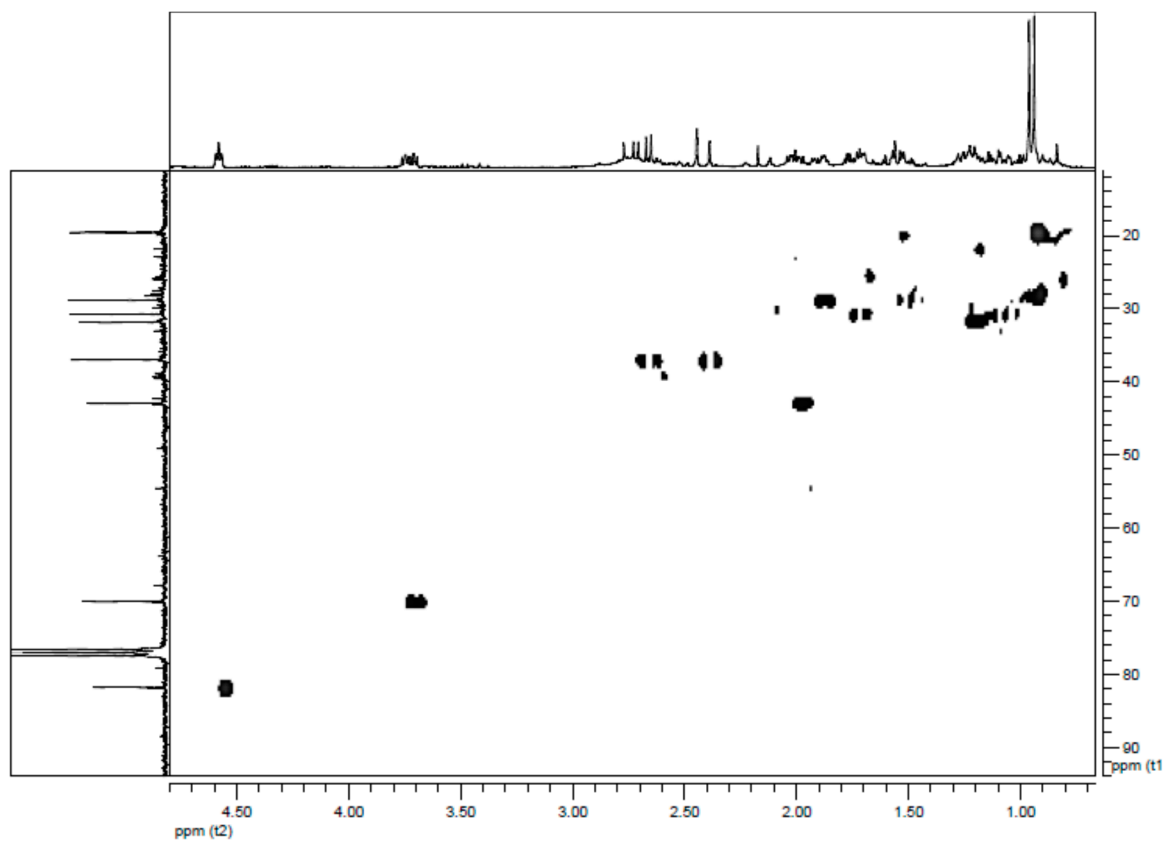

Figure S27. HMQC (300 MHz,  $\text{CDCl}_3$ ) spectrum of hydroxylactone **7a**.

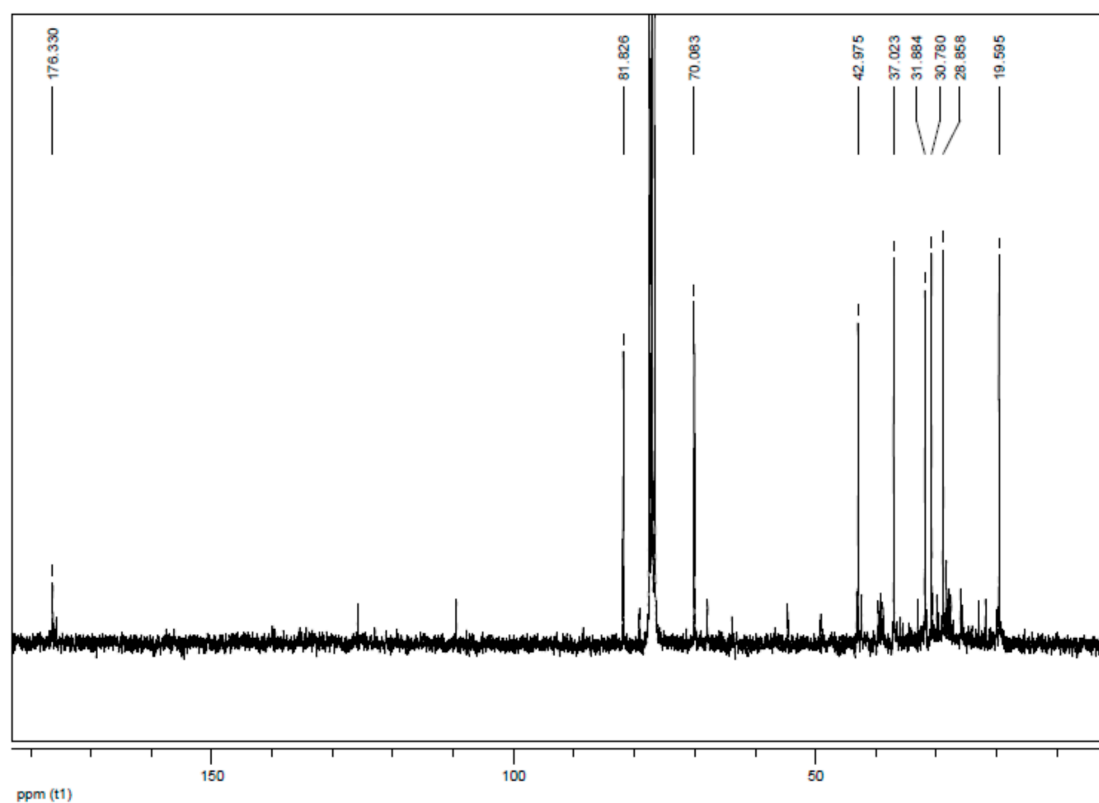

Figure S28.  $^{13}\text{C}$ -NMR (75.5 MHz,  $\text{CDCl}_3$ ) spectrum of iodolactone **7a**.



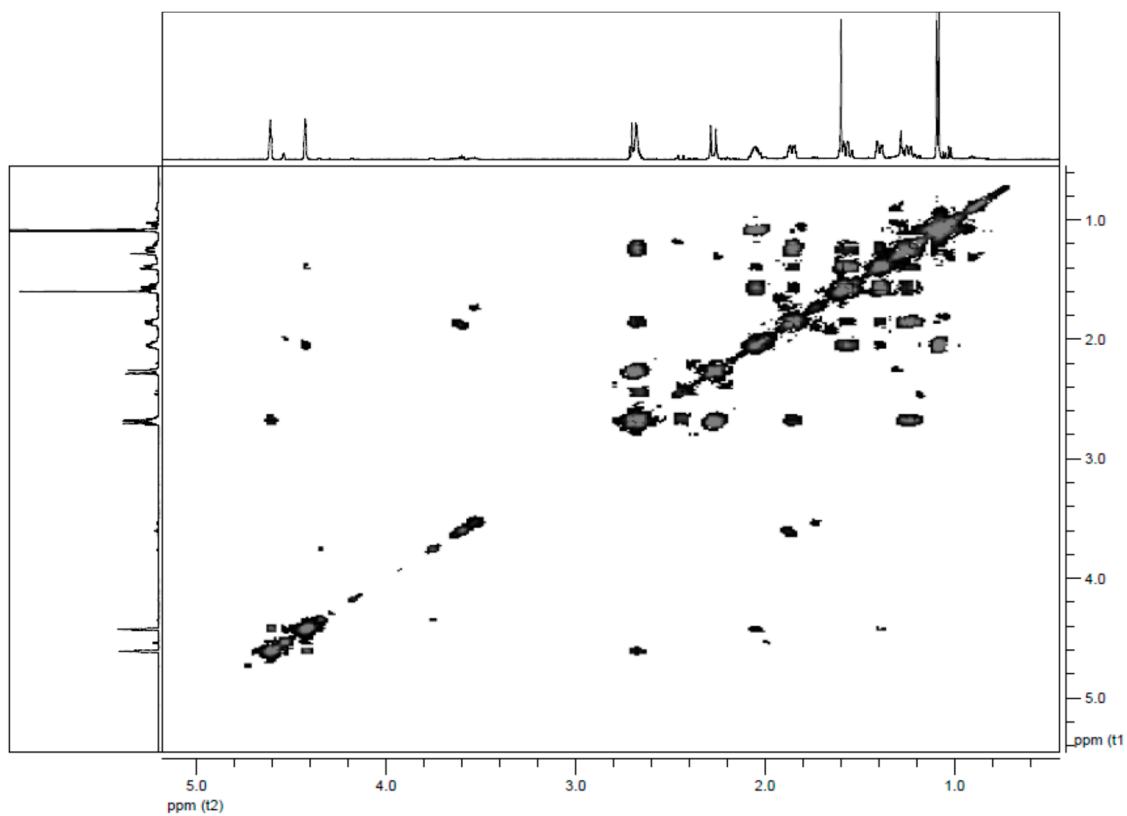

**Figure S32.** COSY (300 MHz, CDCl<sub>3</sub>) spectrum of chlorolactone **3b**.

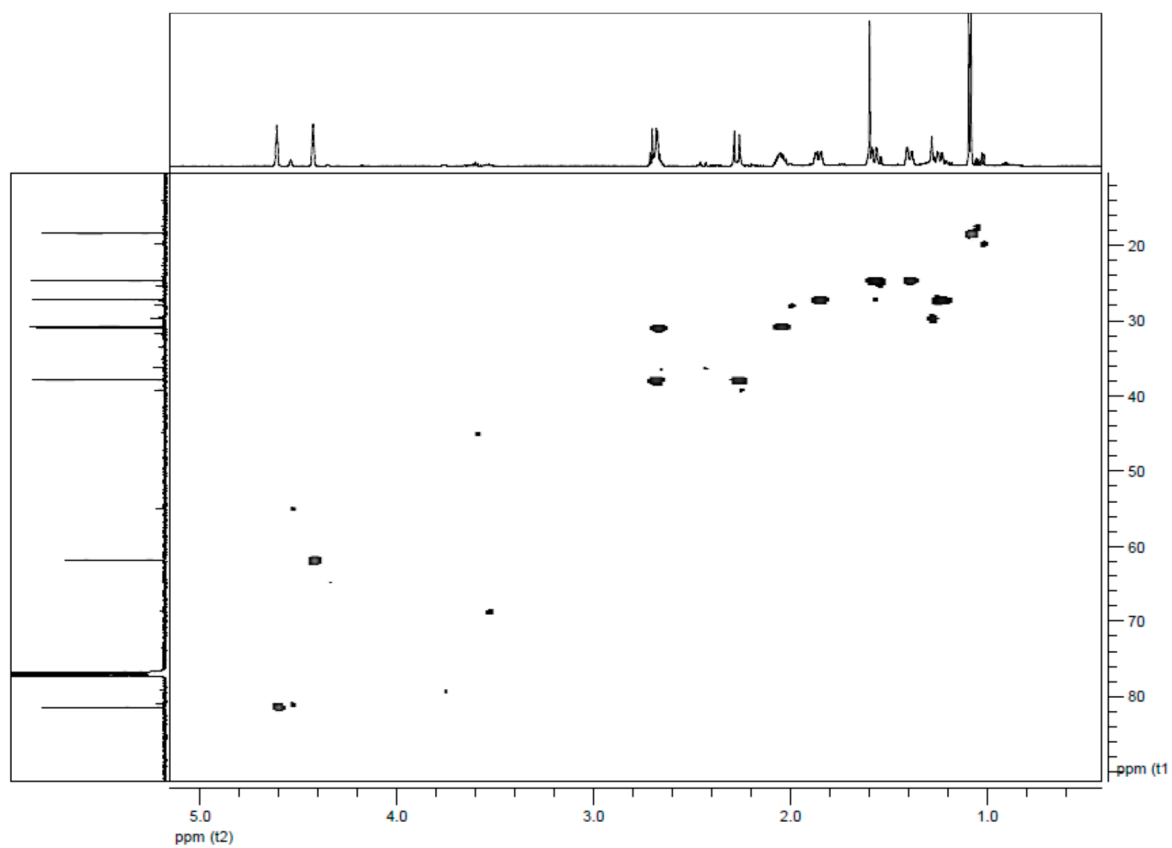

**Figure S33.** HMQC (300 MHz, CDCl<sub>3</sub>) spectrum of chlorolactone **3b**.

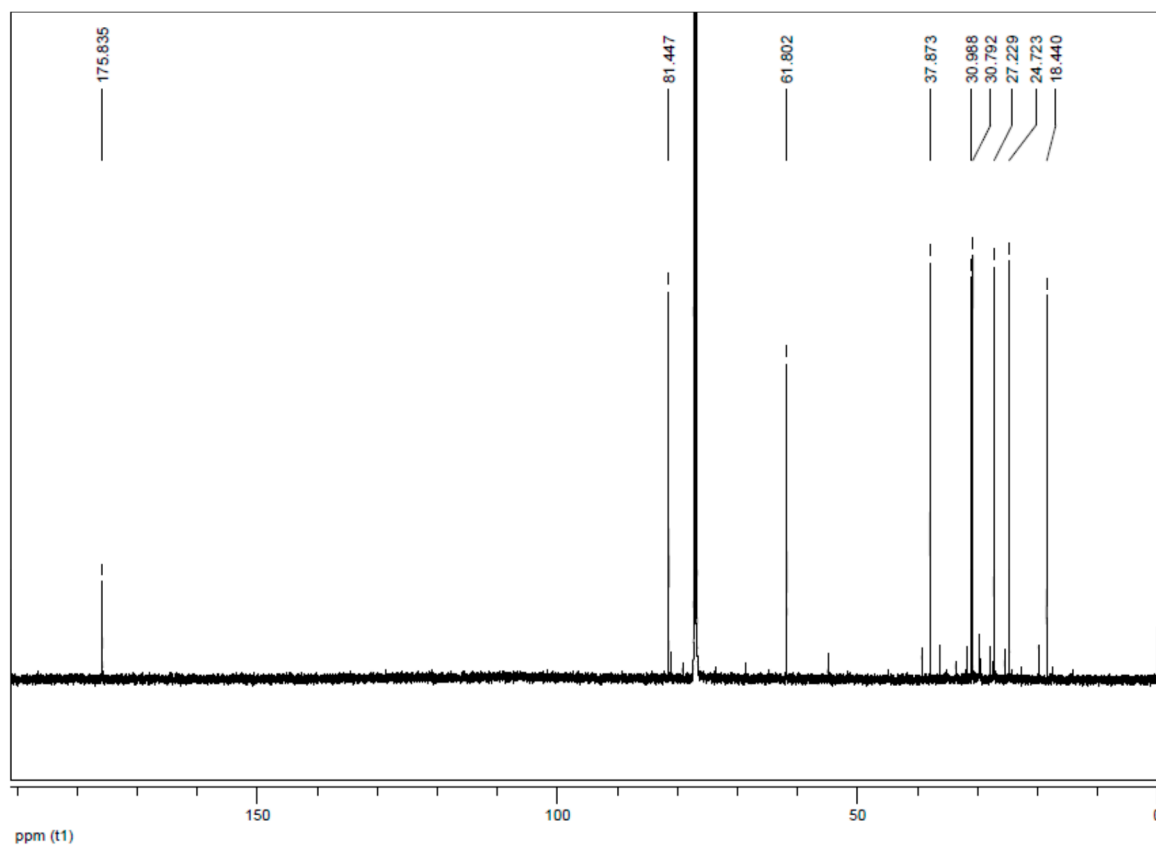

Figure S34. <sup>13</sup>C-NMR (75.5 MHz, CDCl<sub>3</sub>) spectrum of chlorolactone 3b.

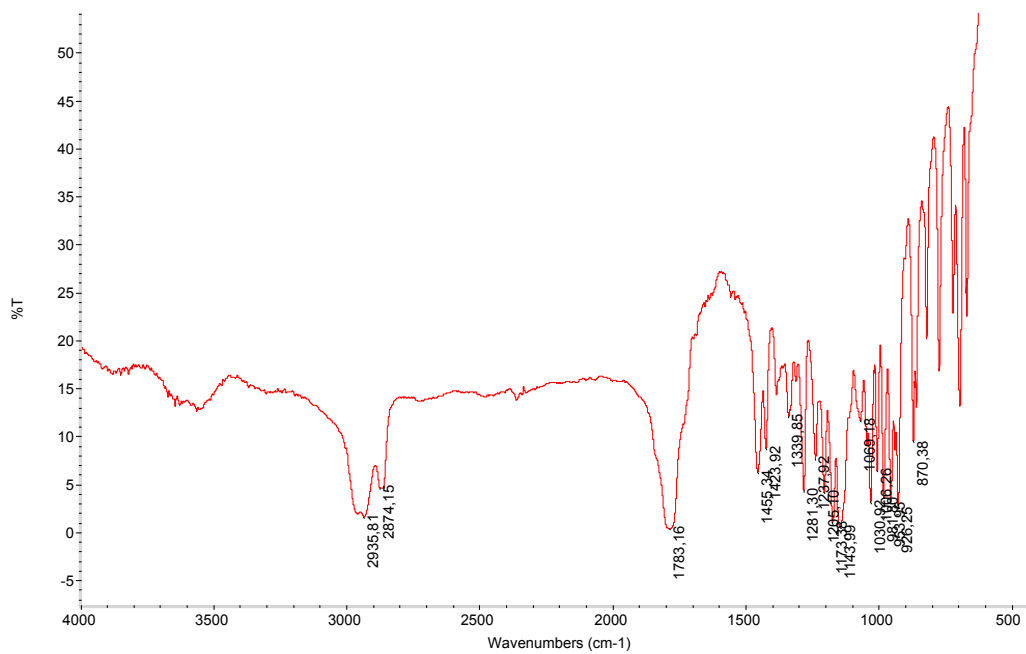

Figure S35. IR spectrum of chlorolactone 3b.



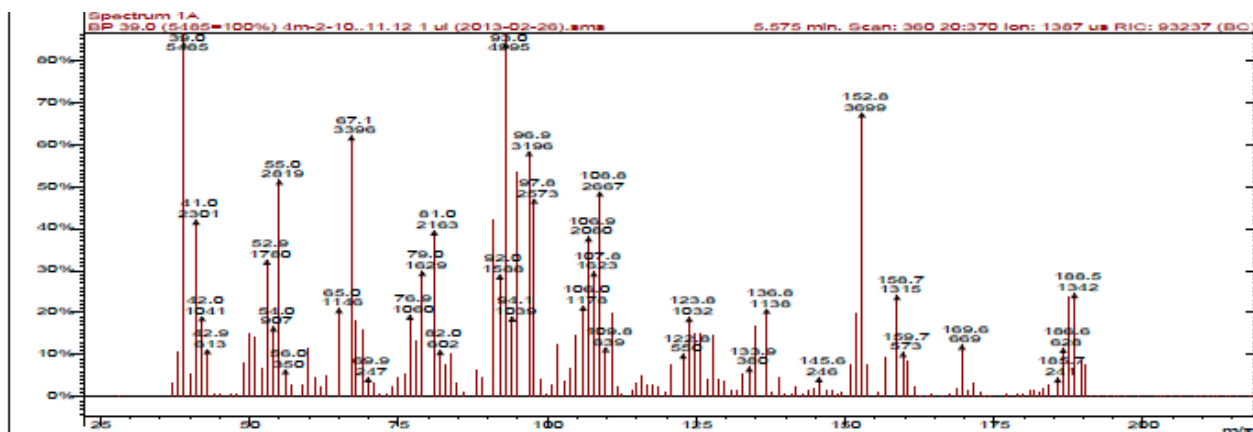

Figure S36. GC-MS spectrum of chlorolactone **3b**.

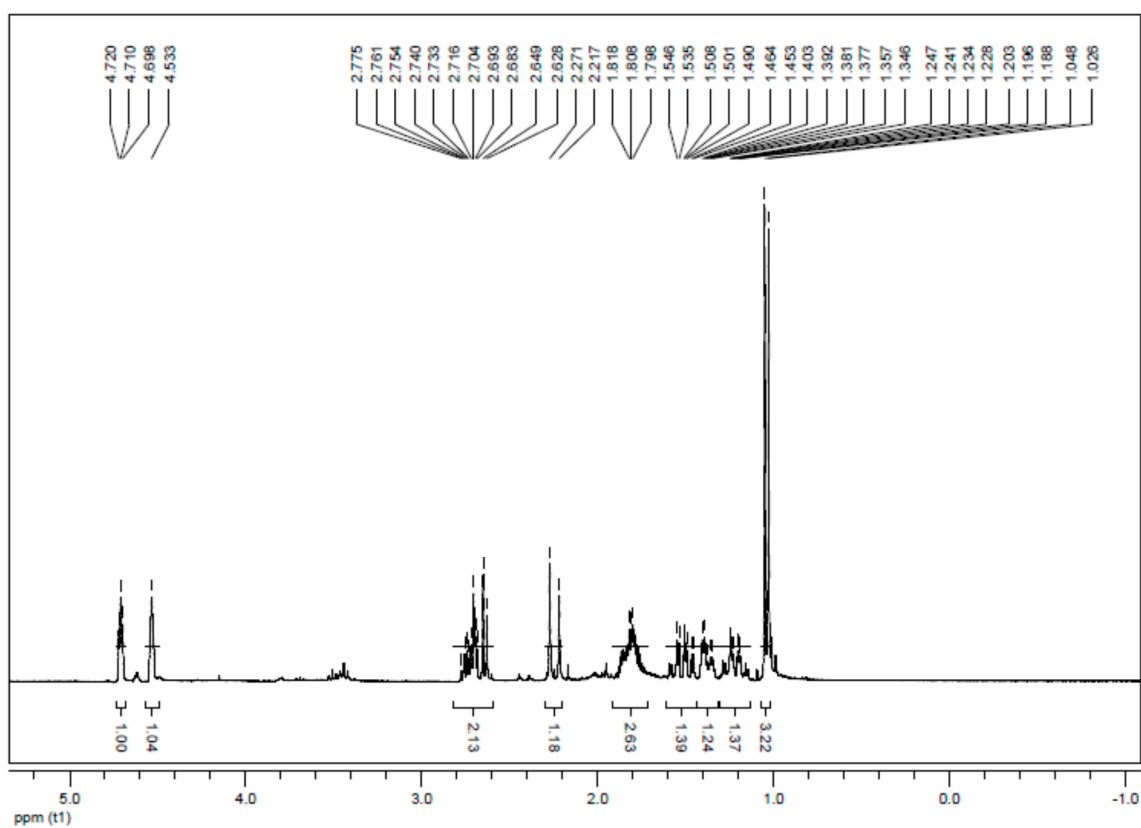

Figure S37.  $^1\text{H-NMR}$  (300 MHz,  $\text{CDCl}_3$ ) spectrum of bromolactone **4b**.

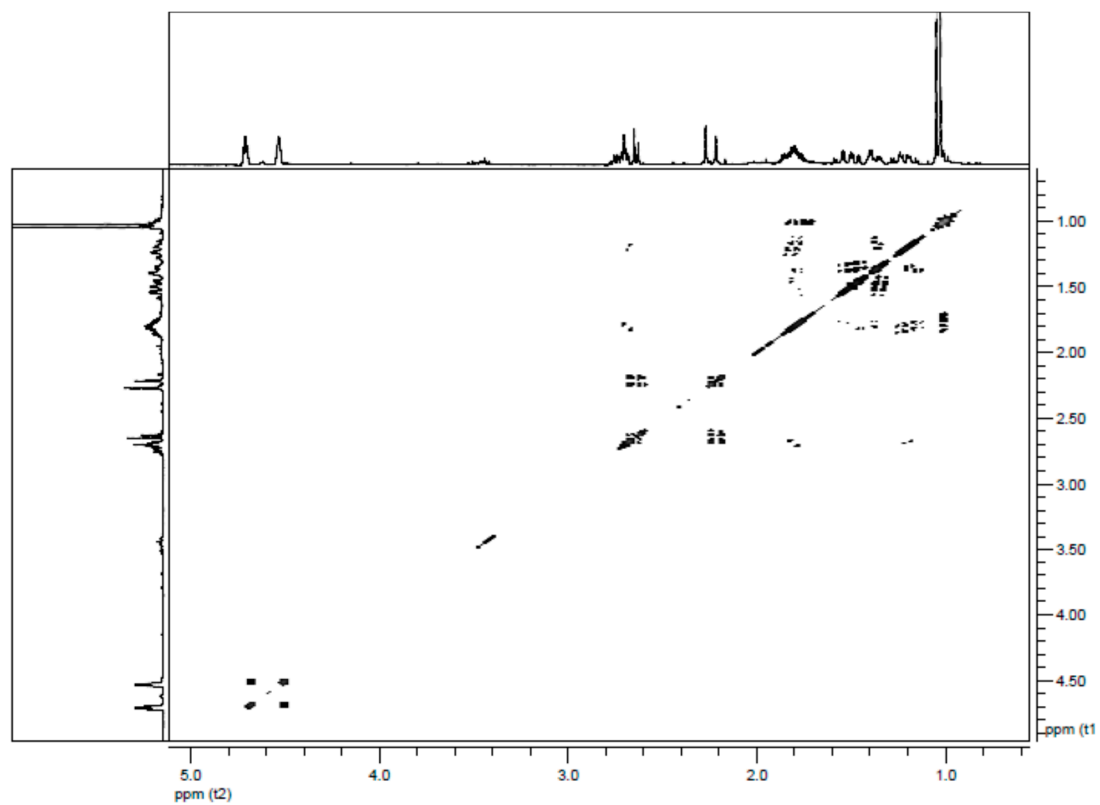

**Figure S38.** COSY (300 MHz, CDCl<sub>3</sub>) spectrum of bromolactone **4b**.

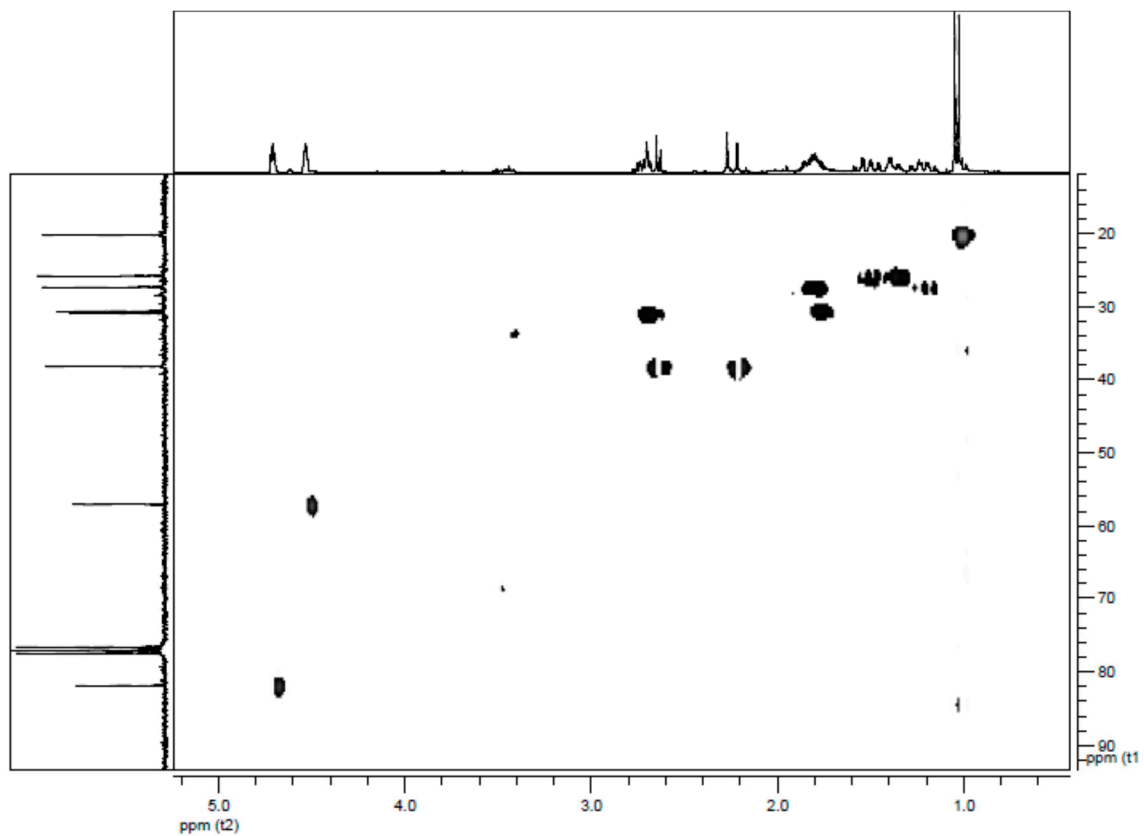

**Figure S39.** HMBC (300 MHz, CDCl<sub>3</sub>) spectrum of bromolactone **4b**.

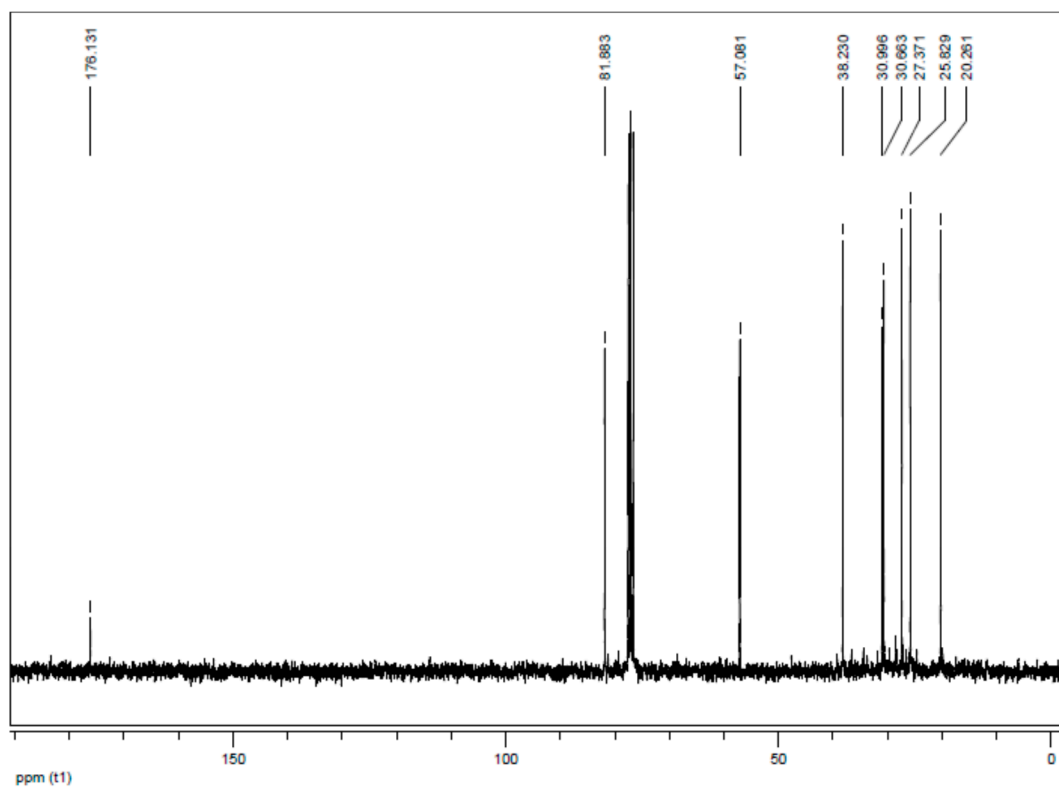

Figure S40.  $^{13}\text{C}$ -NMR (75.5 MHz,  $\text{CDCl}_3$ ) spectrum of bromolactone **4b**.

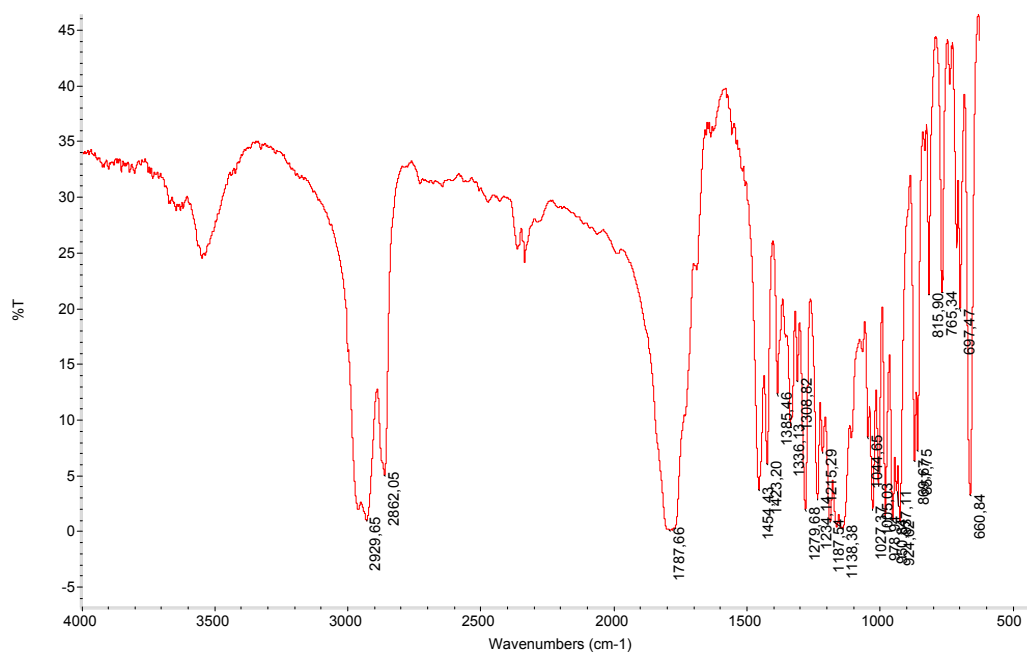

Figure S41. IR spectrum of bromolactone **4b**.

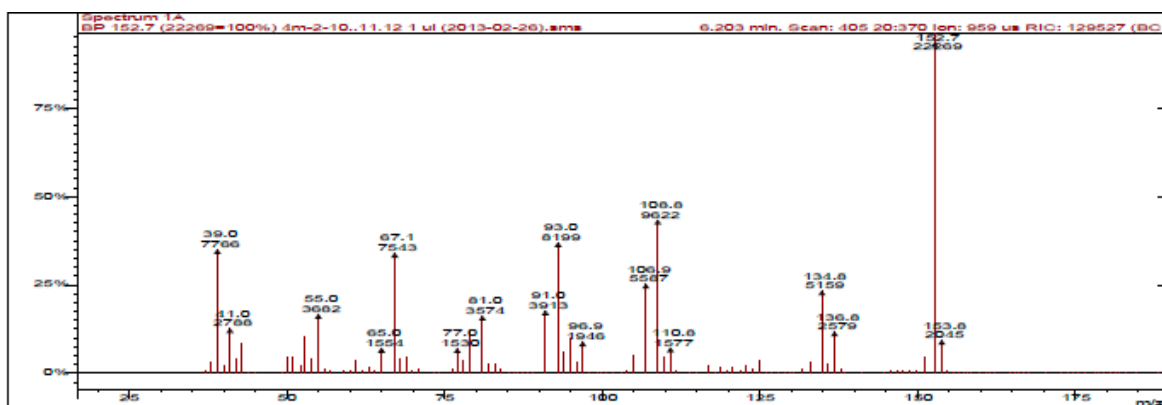

Figure S42. GC-MS spectrum of bromolactone **4b**.

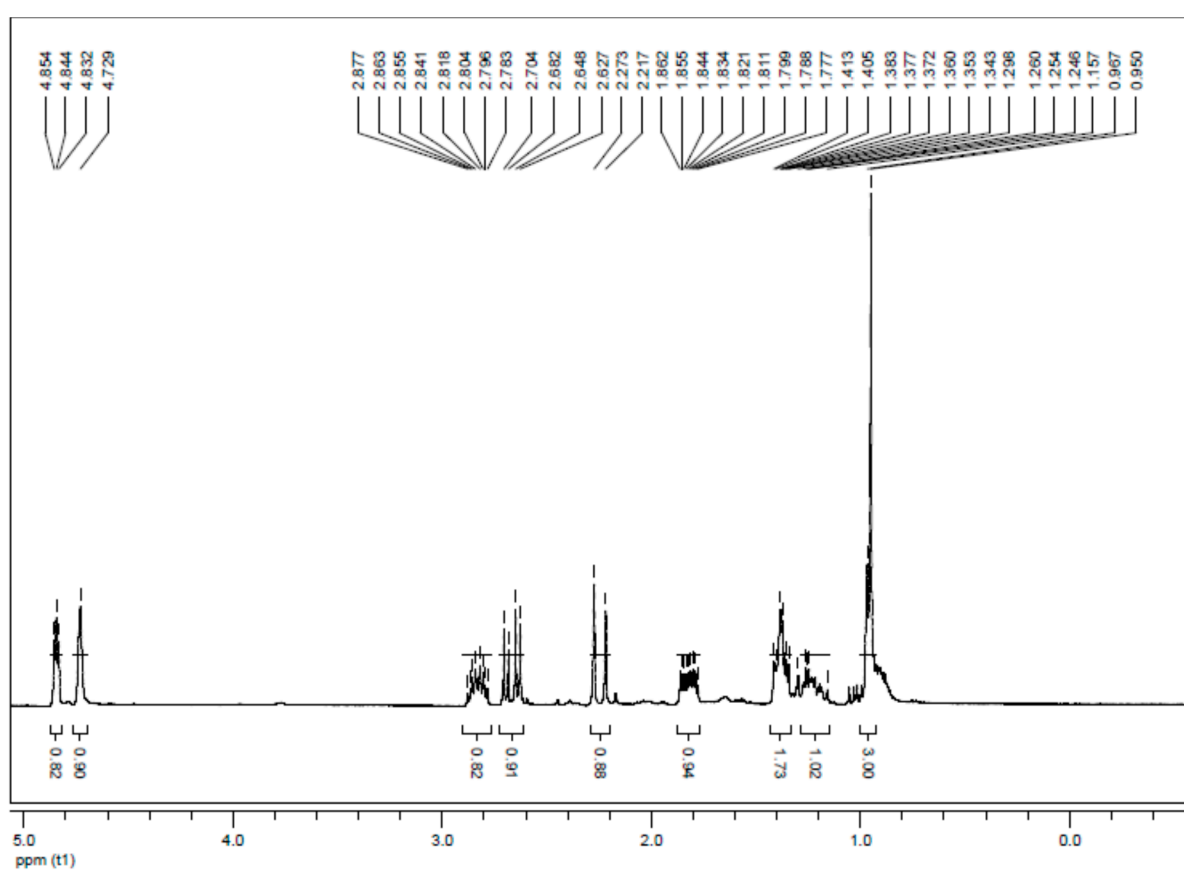

Figure S43.  $^1\text{H-NMR}$  (300 MHz,  $\text{CDCl}_3$ ) spectrum of iodolactone **5b**.

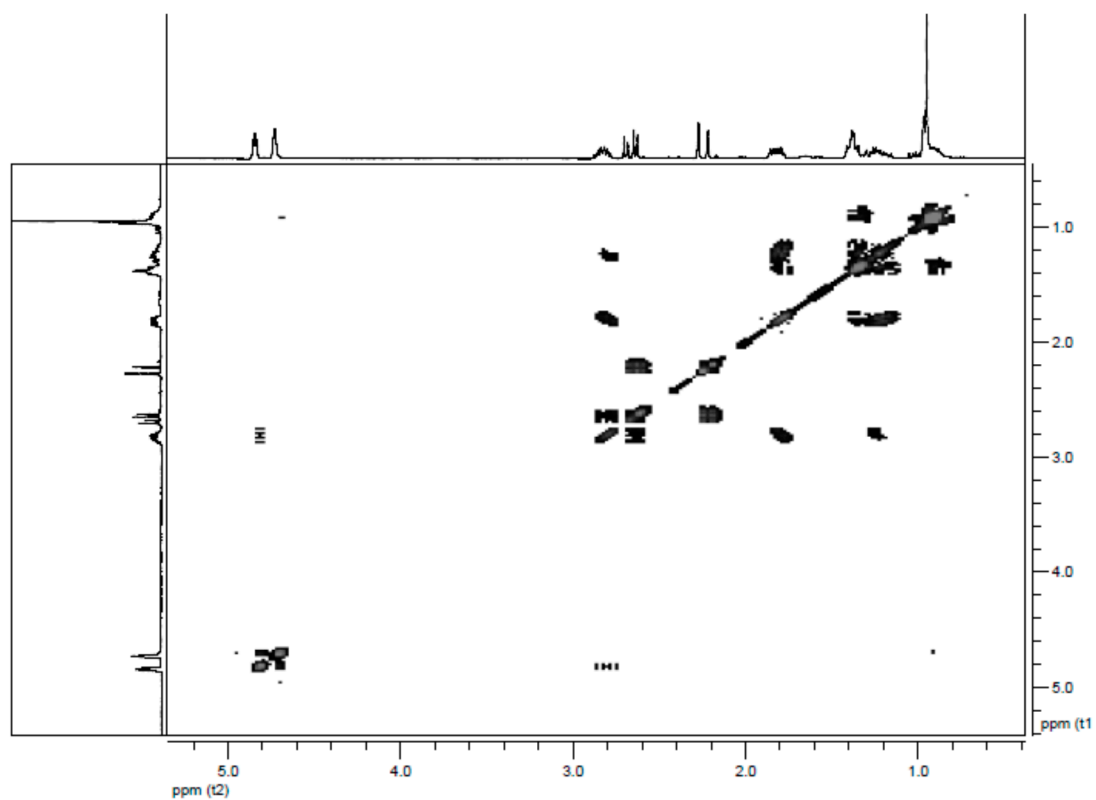

**Figure S44.** COSY (300 MHz, CDCl<sub>3</sub>) spectrum of of iodolactone **5b**.

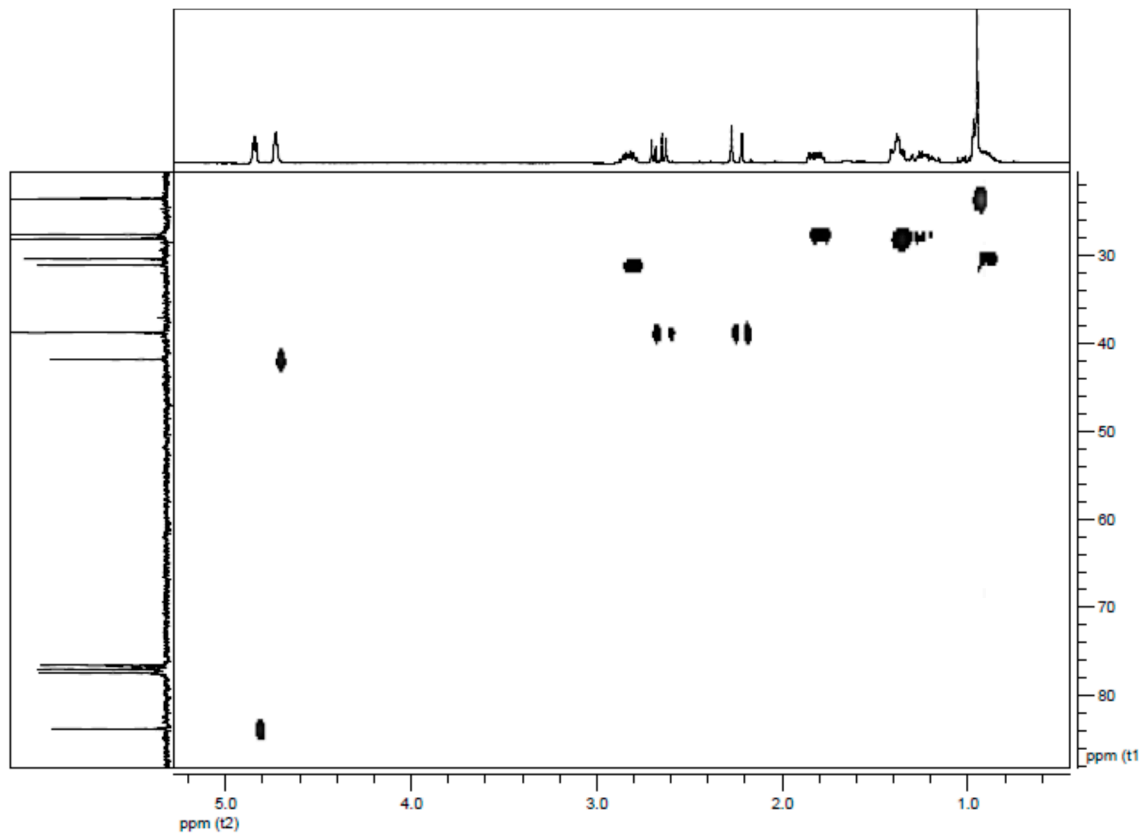

**Figure S45.** HMQC (300 MHz, CDCl<sub>3</sub>) spectrum of of iodolactone **5b**.

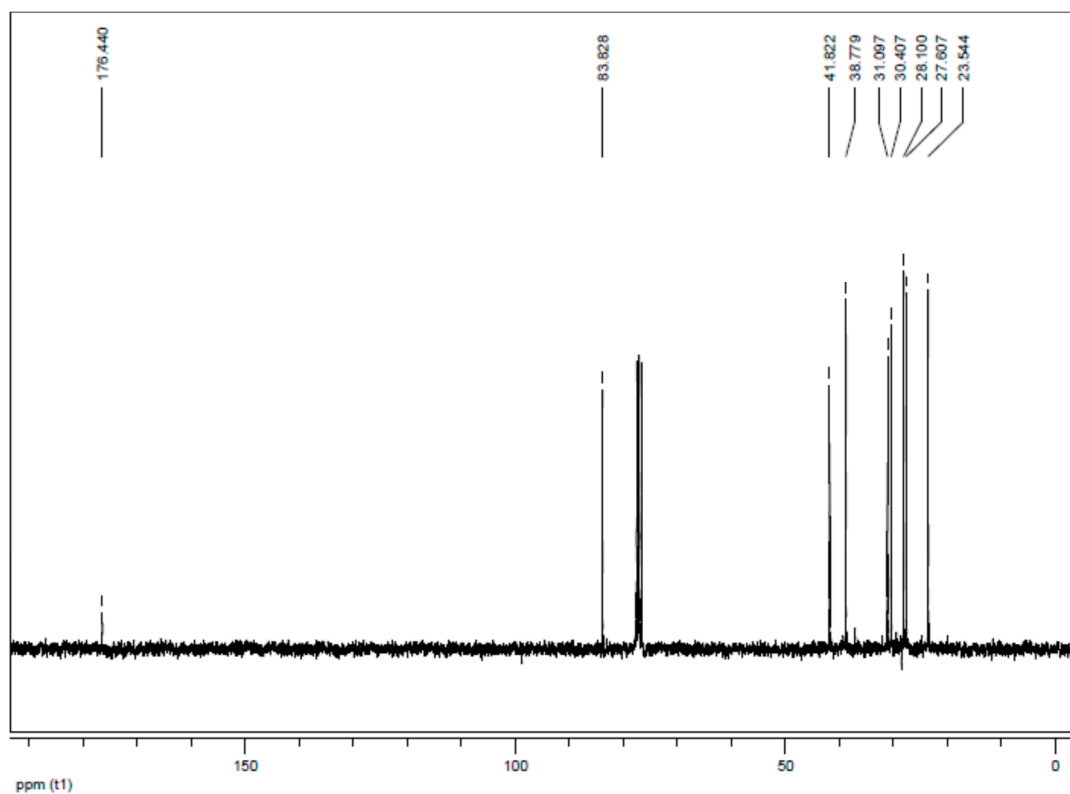

**Figure S46.**  $^{13}\text{C}$ -NMR (75.5 MHz, CDCl<sub>3</sub>) spectrum of of iodolactone **5b**.

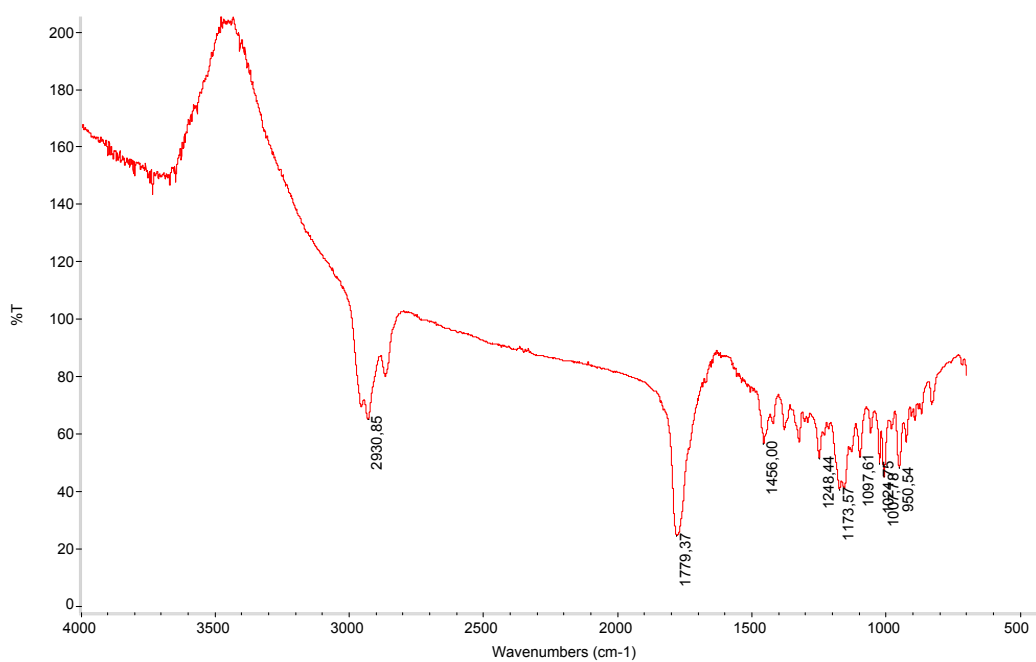

**Figure S47.** IR spectrum of of iodolactone **5b**.

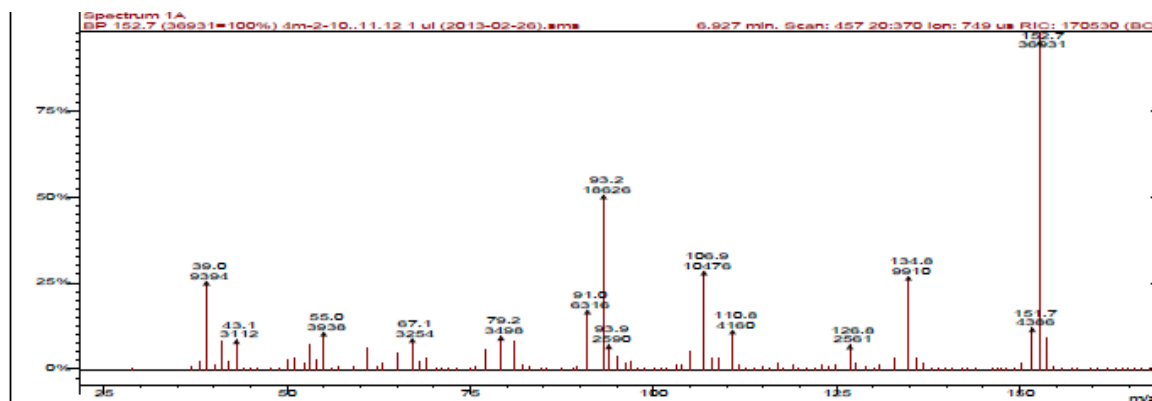

Figure S48. GC-MS spectrum of of iodolactone **5b**.

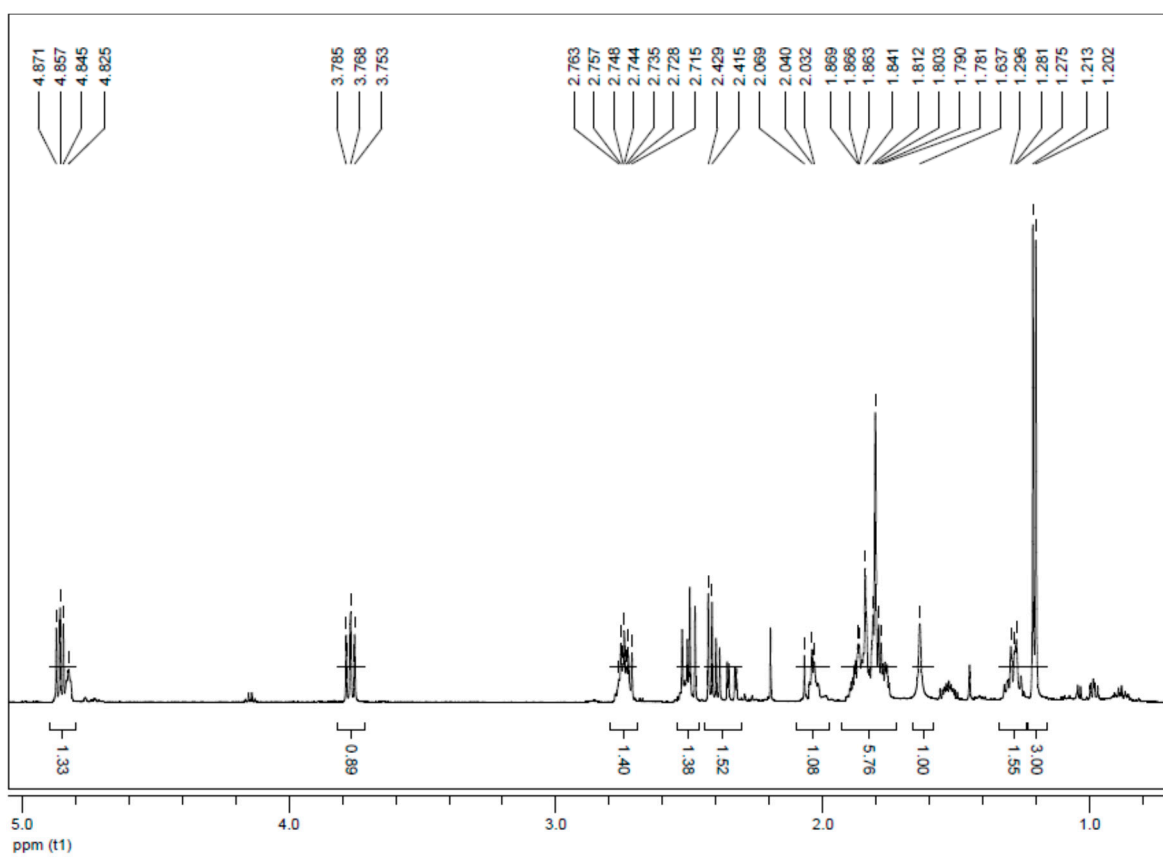

Figure S49.  $^1\text{H-NMR}$  (300 MHz,  $\text{CDCl}_3$ ) spectrum of iodolactone **6b**.

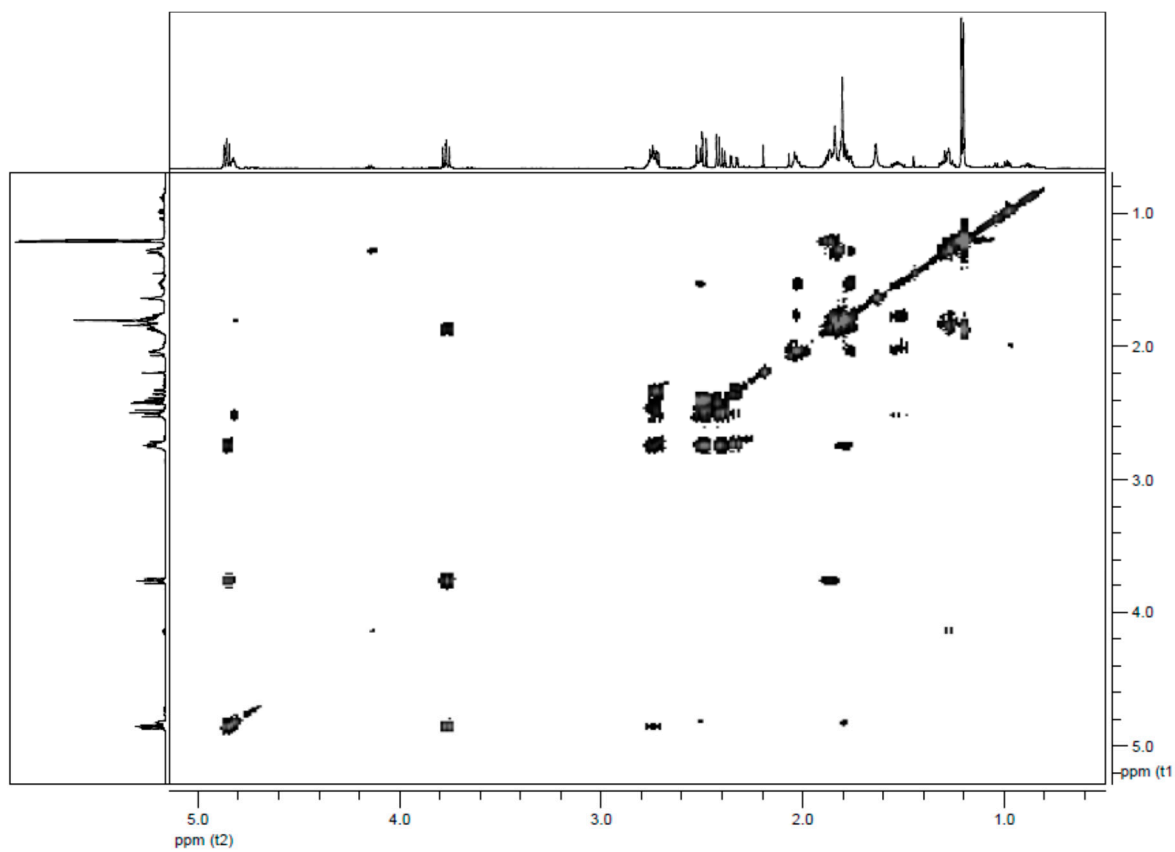

**Figure S50.** COSY (300 MHz, CDCl<sub>3</sub>) spectrum of iodolactone **6b**.

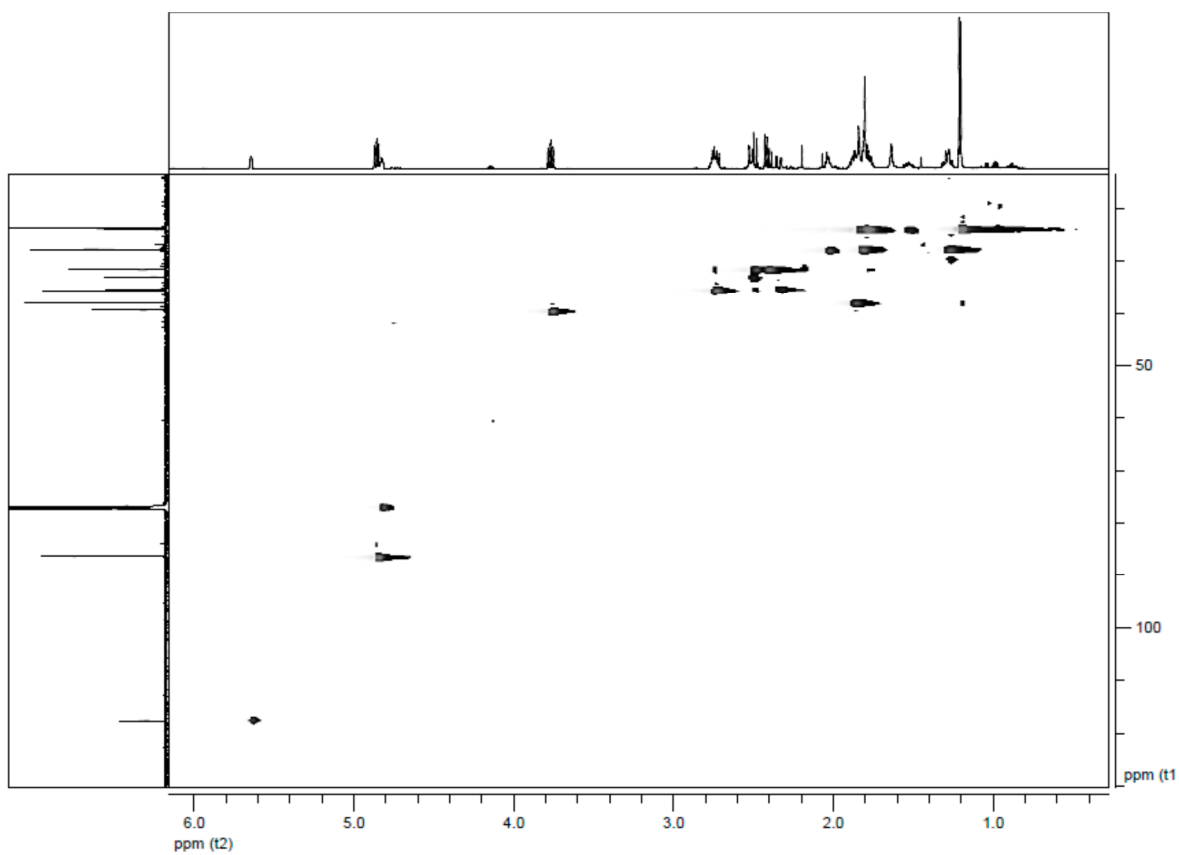

**Figure S51.** HMBC (300 MHz, CDCl<sub>3</sub>) spectrum of iodolactone **6b**.



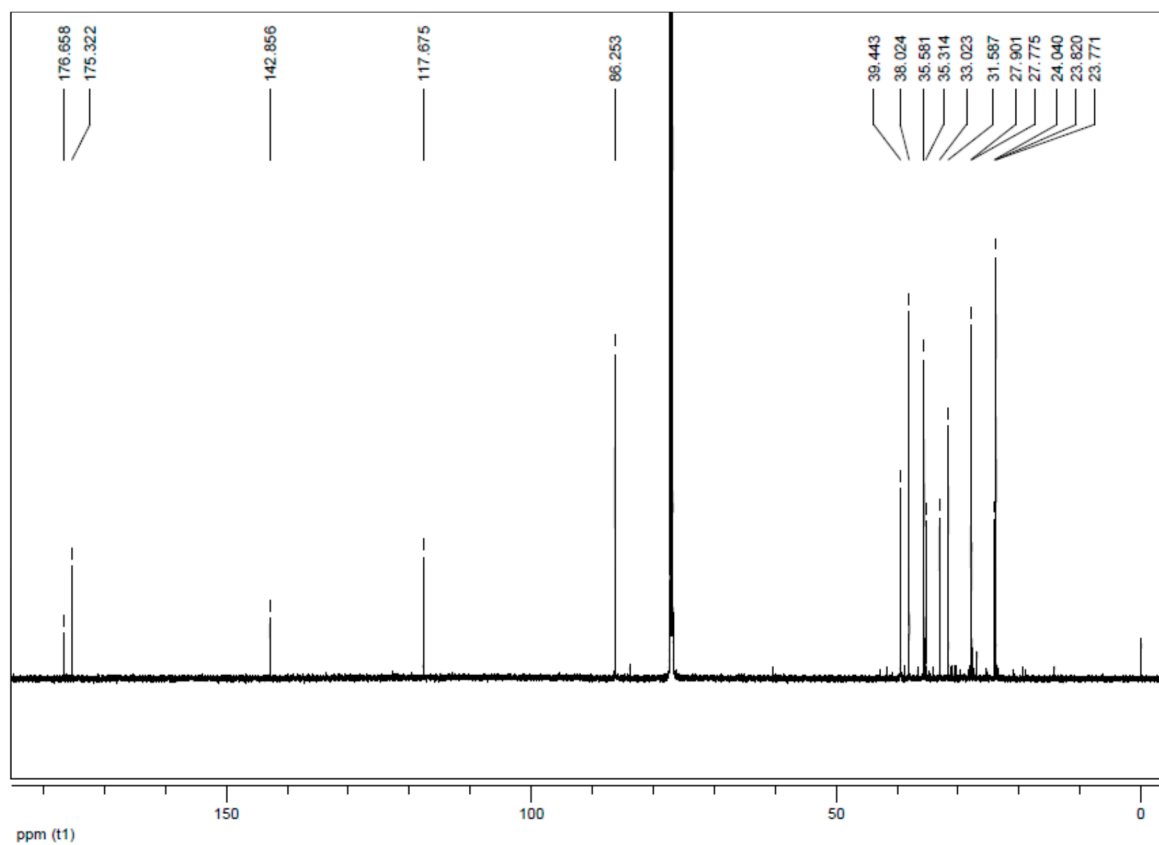

**Figure S52.**  $^{13}\text{C}$ -NMR (75.5 MHz,  $\text{CDCl}_3$ ) spectrum of of iodolactone **6b**.

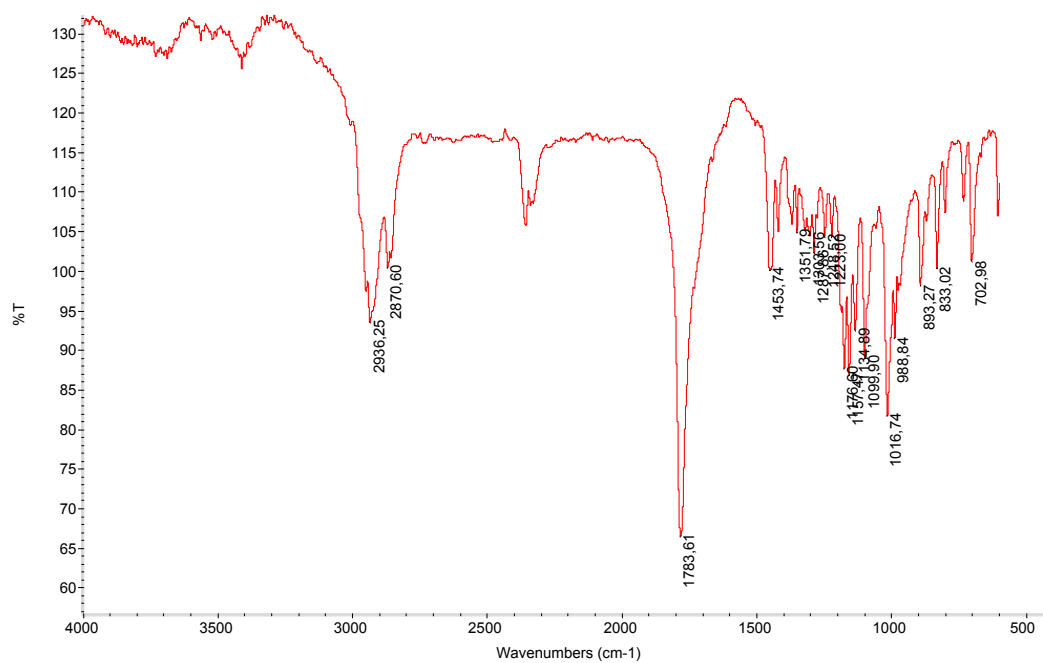

**Figure S53.** IR spectrum of of iodolactone **6b**.

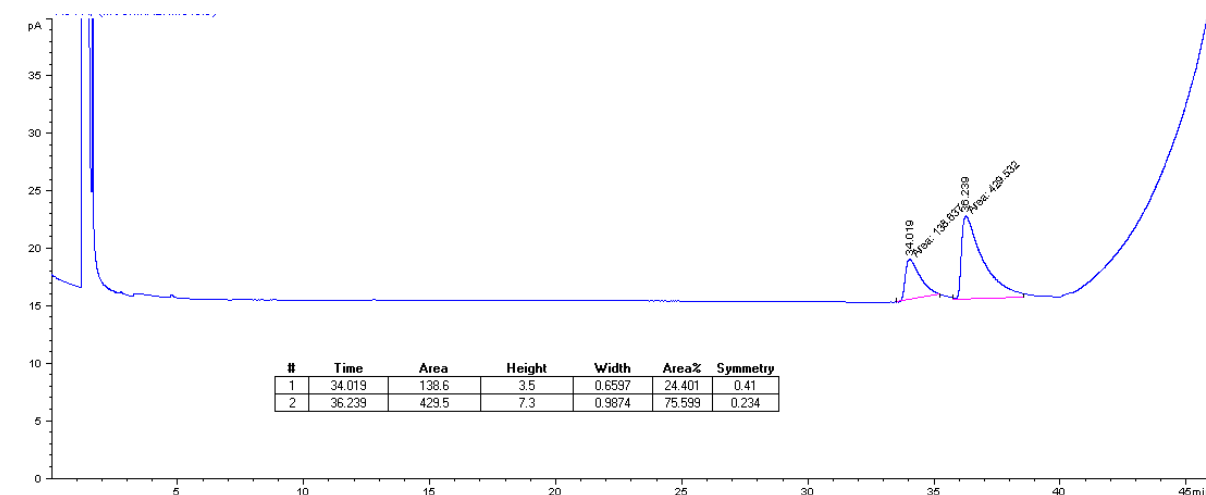

**Figure S54.** Chromatogram of hydroxylacton **7a** obtained from chlorolactone **3a** by *F. culmorum* AM10.

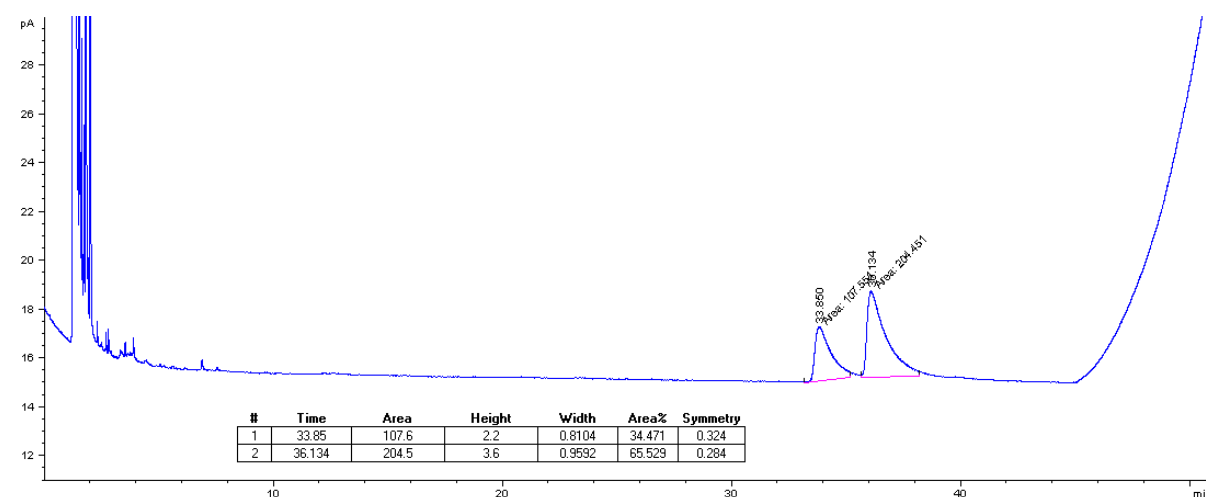

**Figure S55.** Chromatogram of hydroxylacton **7a** obtained from chlorolactone **3a** by *F. culmorum* AM22.

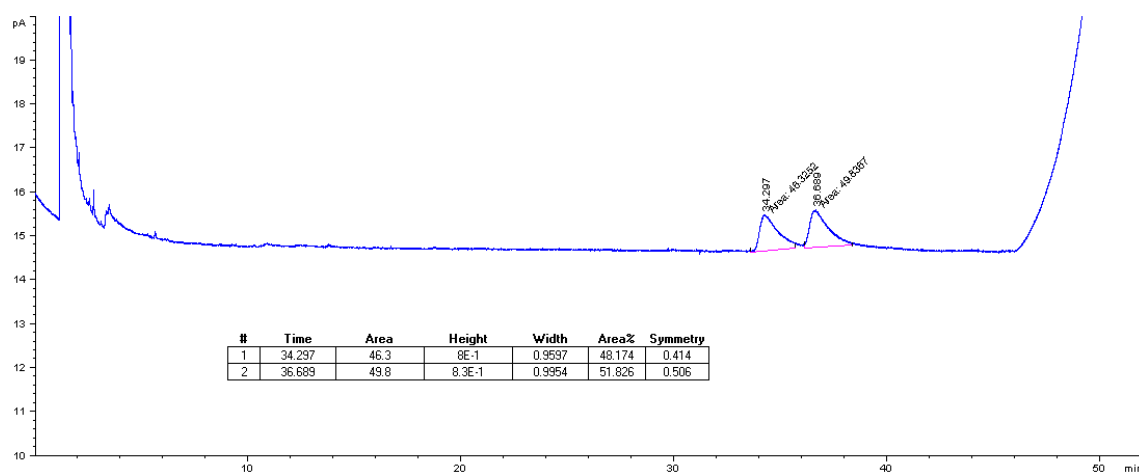

**Figure S56.** Chromatogram of hydroxylacton **7a** obtained from chlorolactone **3a** by *F. culmorum* AM203.

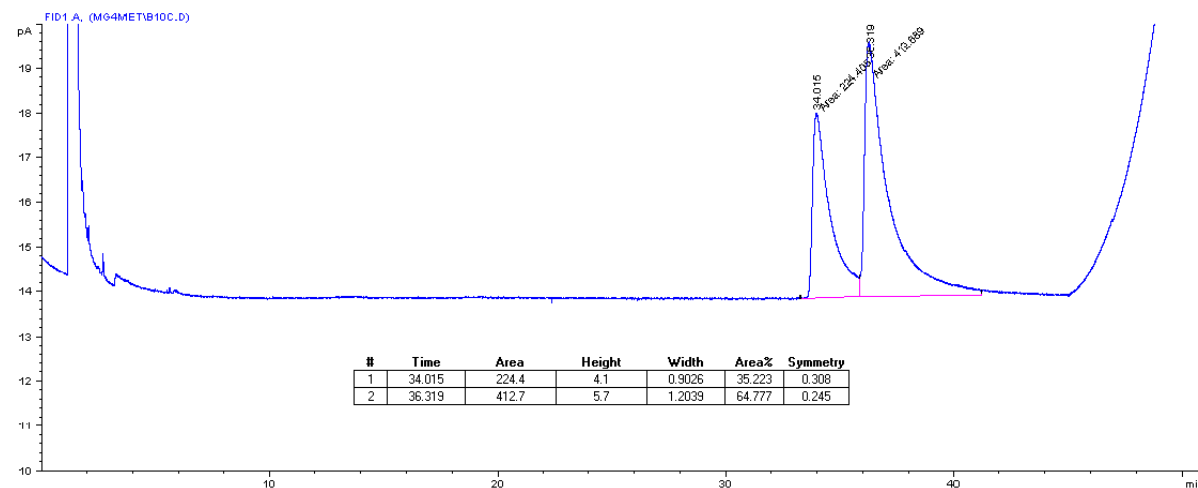

**Figure S57.** Chromatogram of hydroxylacton **7a** obtained from bromolactone **4a** by *F. culmorum* AM10.

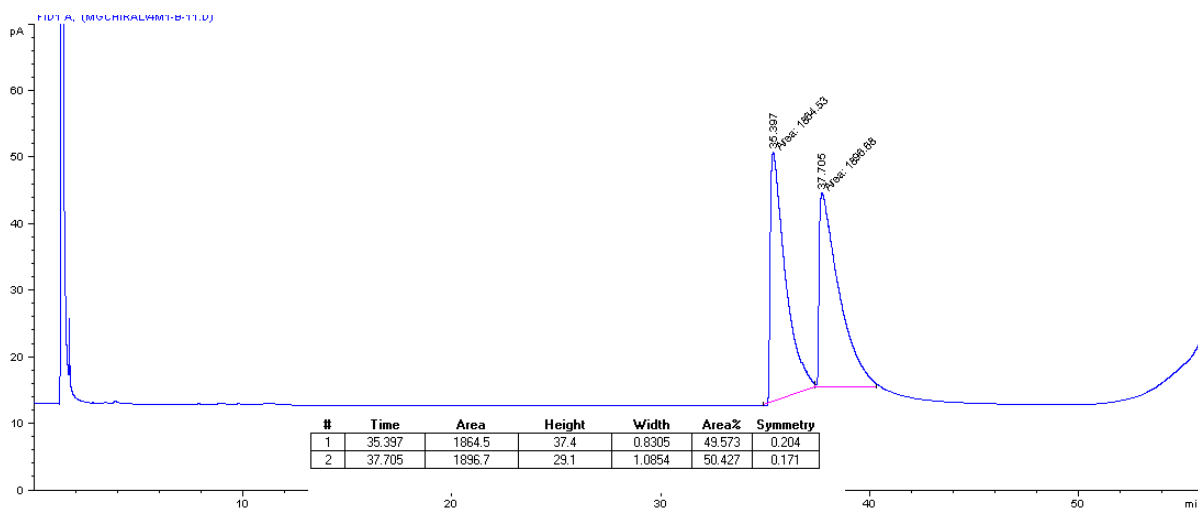

**Figure S58.** Chromatogram of hydroxylacton **7a** obtained from bromolactone **4a** by *F. culmorum* AM11.

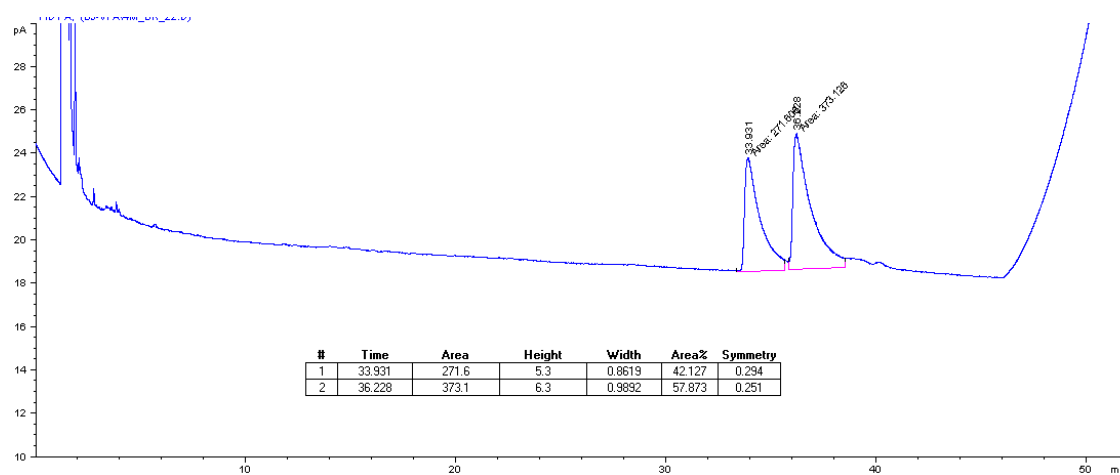

**Figure S59.** Chromatogram of hydroxylacton **7a** obtained from bromolactone **4a** by *F. culmorum* AM22.

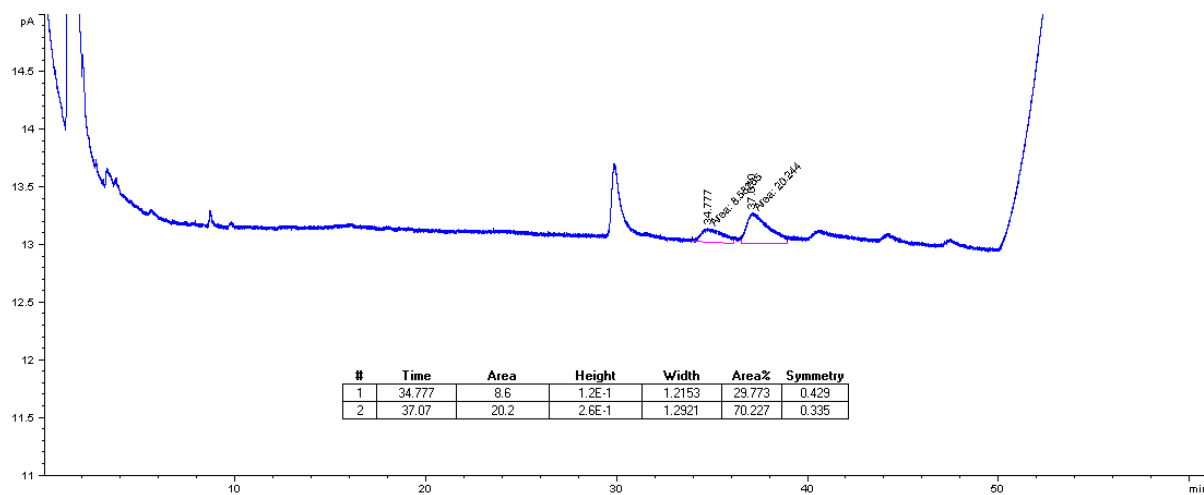

**Figure S60.** Chromatogram of hydroxylacton **7a** obtained from bromolactone **4a** by *F. culmorum* AM199.

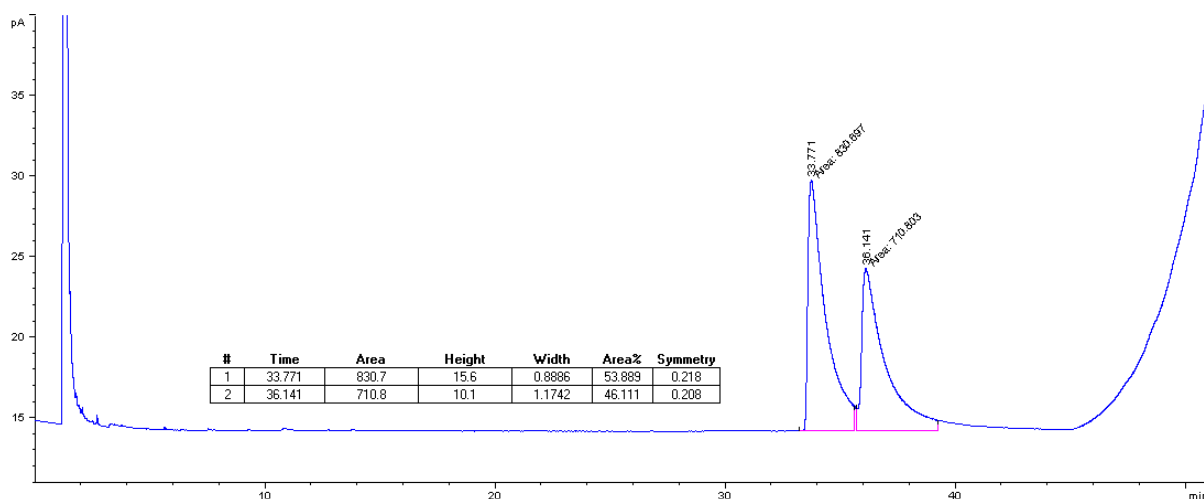

**Figure S61.** Chromatogram of hydroxylacton **7a** obtained from bromolactone **4a** by *F. culmorum* AM203.

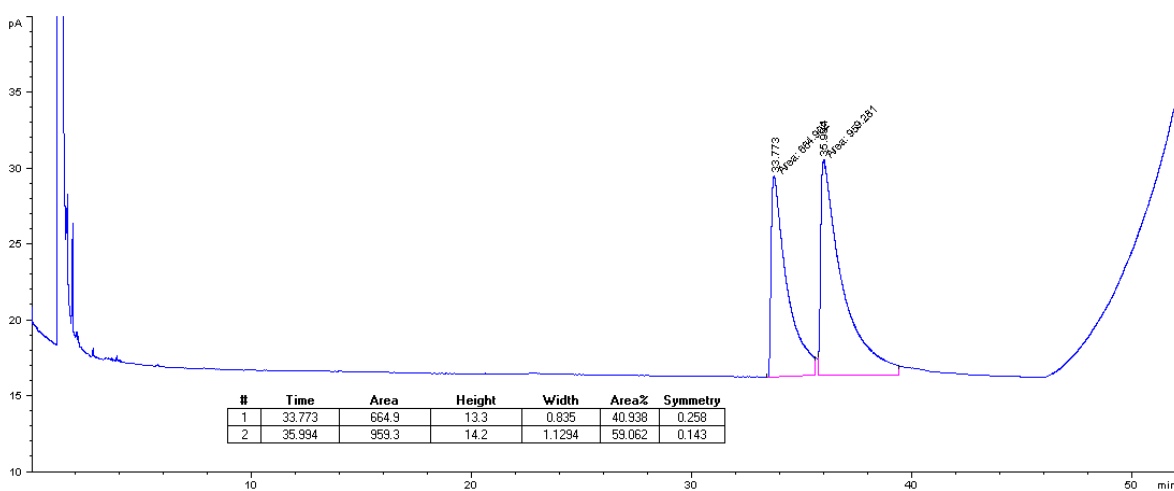

**Figure S62.** Chromatogram of hydroxylacton **7a** obtained from bromolactone **4a** by *F. culmorum* AM235.

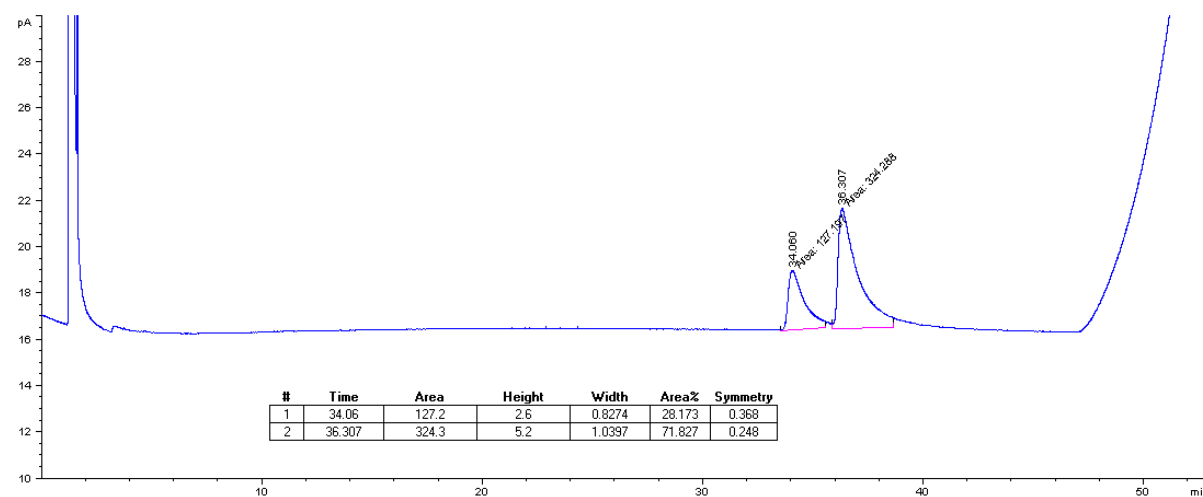

**Figure S63.** Chromatogram of hydroxylacton **7a** obtained from iodolactone **5a** by *F. culmorum* AM10.

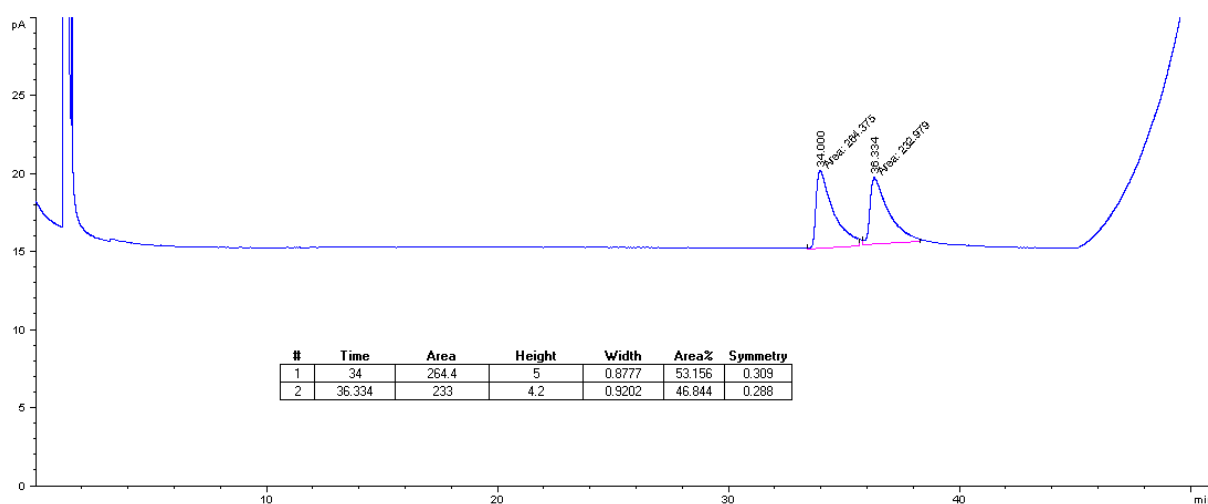

**Figure S64.** Chromatogram of hydroxylacton **7a** obtained from iodolactone **5a** by *F. culmorum* AM11.

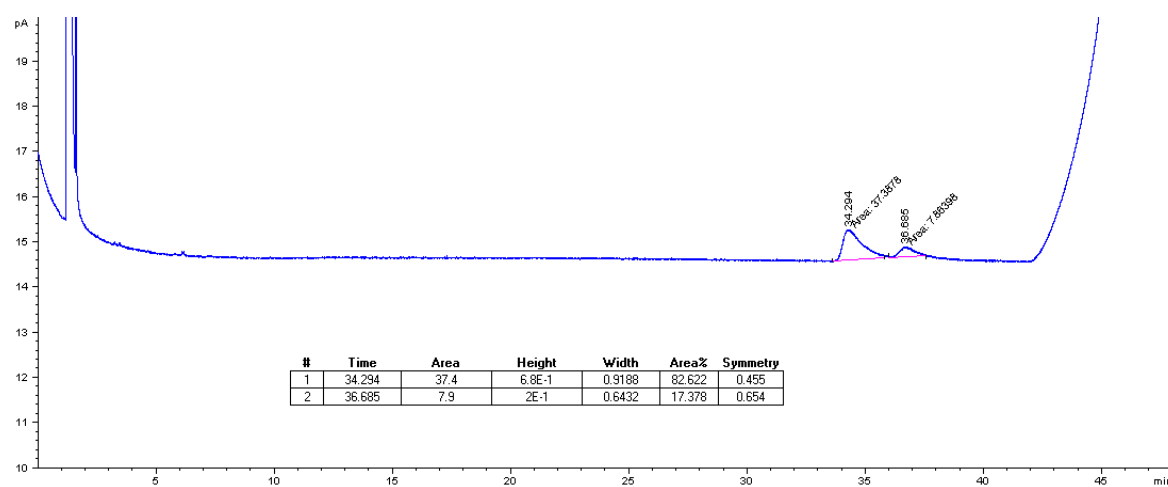

**Figure S65.** Chromatogram of hydroxylacton **7a** obtained from iodolactone **5a** by *F. culmorum* AM13.

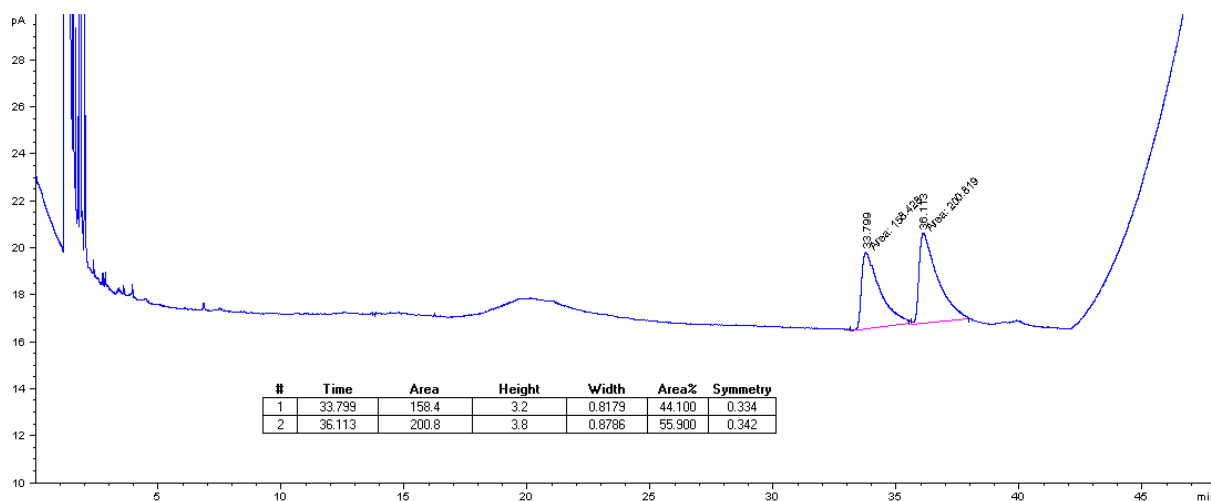

**Figure S66.** Chromatogram of hydroxylacton **7a** obtained from iodolactone **5a** by *F. culmorum* AM22.

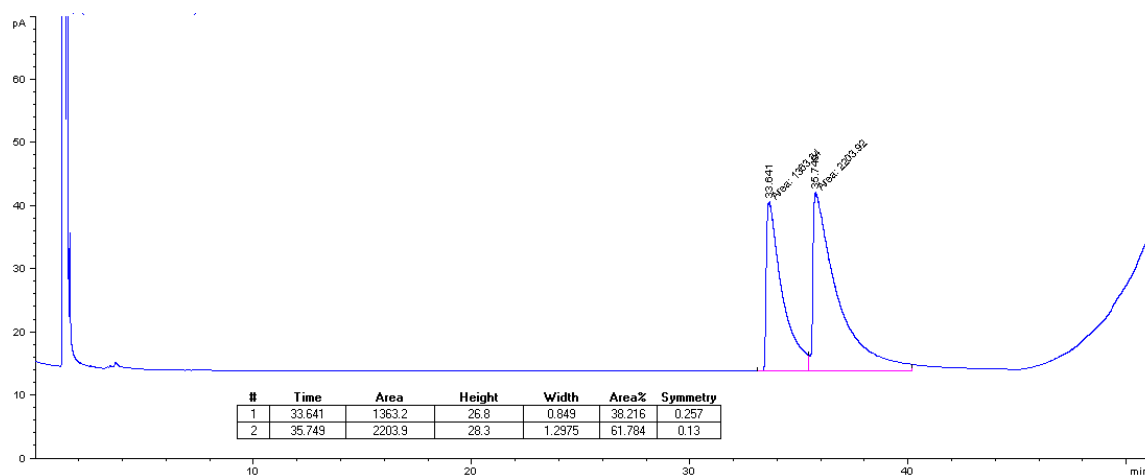

**Figure S67.** Chromatogram of hydroxylacton **7a** obtained from iodolactone **5a** by *F. culmorum* AM105.

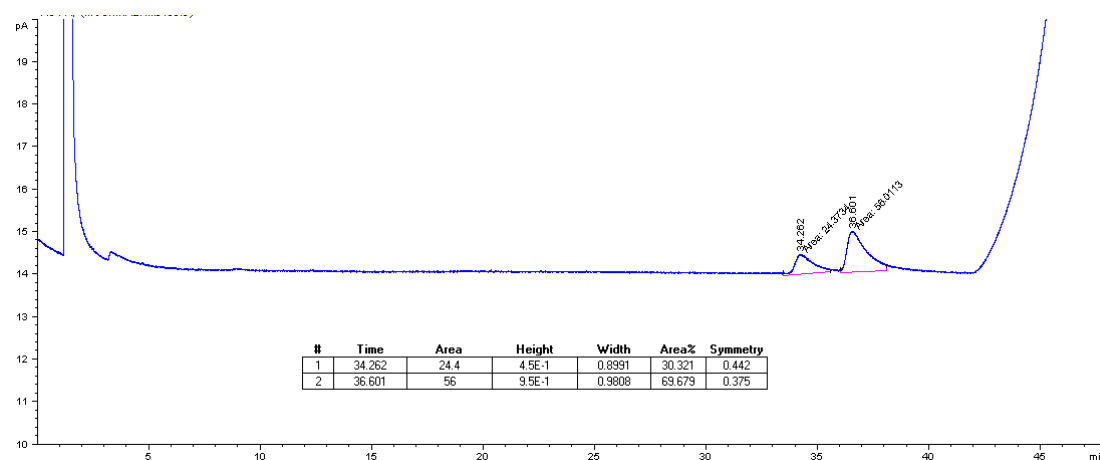

**Figure S68.** Chromatogram of hydroxylacton **7a** obtained from iodolactone **5a** by *F. culmorum* AM199.

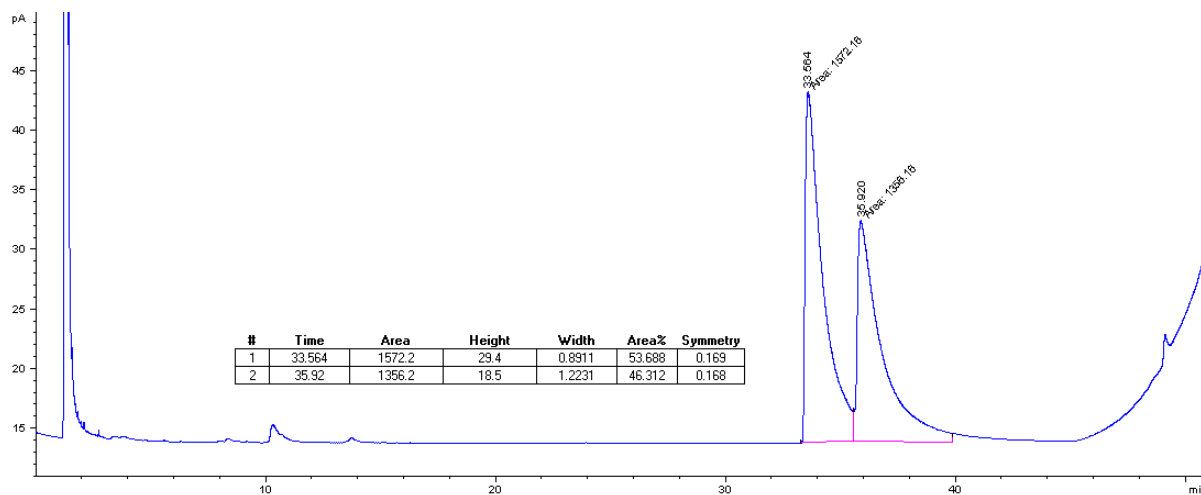

**Figure S69.** Chromatogram of hydroxylactone **7a** obtained from iodolactone **5a** by *F. culmorum* AM203.

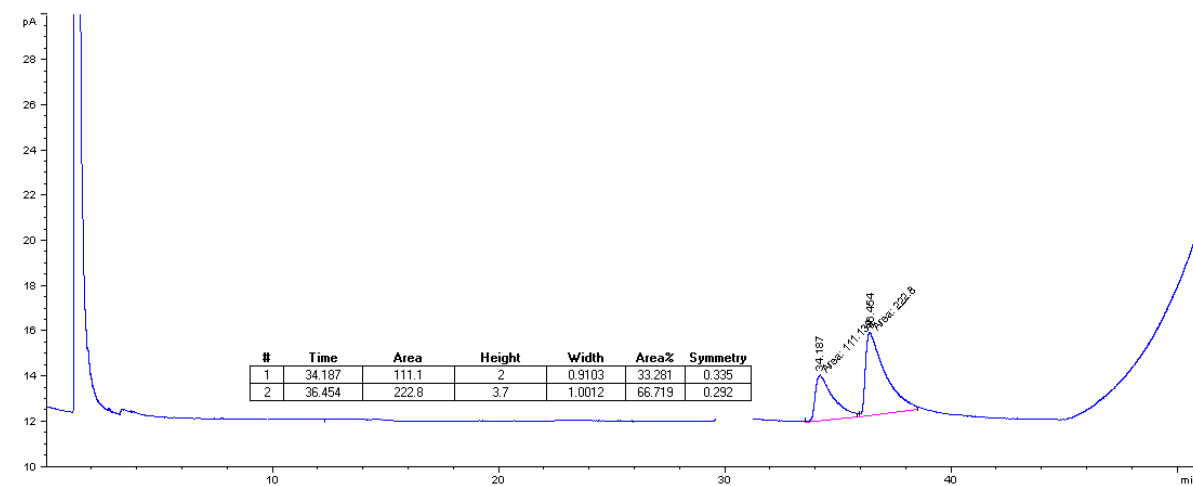

**Figure S70.** Chromatogram of hydroxylactone **7a** obtained from iodolactone **5a** by *F. culmorum* AM235.
